# Supplementary material for: Self-reported history of head injury is associated with cognitive impulsivity on a delay discounting task
Source: PeerJ. 2025 Mar 7;13:e19057. doi: 10.7717/peerj.19057 (PMC11892457; doi:10.7717/peerj.19057)
Supplement: Supplemental Information 1 [file peerj-13-19057-s001.xlsx]

## Sheet: summary
SubjID	demog_YN	MCQ_YN	GNG_YN	RPLT_YN	EST_YN	IAT_YN	BDI_YN	BISBAS_YN	Barratt_YN	AMBI_YN	UPPS_YN	ATQ_YN	ok_to_use	forGNG	forRPLT	forEST
4229	.	.	ok	.	.	.	??	.	??	.	.	.	test_only	.	.	.
5172	.	.	ok	ok	ok	ok	??	.	??	.	.	.	test_only	.	.	.
8273	.	.	.	.	.	.	??	.	??	.	.	.	test_only	.	.	.
9244	.	.	.	.	.	.	??	.	??	.	.	.	test_only	.	.	.
9280	.	.	.	.	.	.	??	.	??	.	.	.	test_only	.	.	.
9570	.	.	ok	.	.	ok	??	.	??	.	.	.	test_only	.	.	.
21389	ok	ok	.	.	.	.	??	.	??	ok	ok	.	no_ncog	.	.	.
21393	ok	ok	ok	ok	ok	ok	??	ok	??	ok	ok	ok	ok	ok	ok	ok
21395	ok	ok	.	.	.	.	??	.	??	ok	ok	.	no_ncog	.	.	.
21398	ok	.	ok	ok	ok	ok	??	.	??	ok	ok	.	partial	.	ok	.
21406	ok	ok	ok	ok	ok	ok	??	.	??	ok	ok	.	ok	ok	ok	.
21414	ok	ok	ok	ok	ok	ok	??	.	??	ok	ok	.	ok	ok	ok	.
21415	ok	ok	ok	ok	ok	ok	??	ok	??	ok	ok	ok	ok	ok	ok	ok
21416	ok	ok	ok	ok	ok	ok	??	.	??	ok	ok	.	ok	ok	ok	.
21418	ok	ok	.	.	.	.	??	.	??	ok	ok	.	no_ncog	.	.	.
21419	ok	ok	.	.	.	.	??	.	??	ok	ok	.	no_ncog	.	.	.
21428	ok	ok	ok	ok	ok	ok	??	ok	??	ok	ok	ok	ok	ok	ok	ok
21430	ok	ok	.	.	.	.	??	.	??	ok	ok	.	no_ncog	.	.	.
21431	ok	ok	ok	ok	ok	ok	??	.	??	ok	ok	.	ok	ok	ok	.
21432	ok	ok	.	.	.	.	??	.	??	ok	ok	.	no_ncog	.	.	.
21433	.	.	.	ok	.	.	??	.	??	.	.	.	test_only	.	.	.
21437	ok	ok	ok	ok	ok	ok	??	.	??	ok	ok	.	ok	ok	ok	.
21438	ok	ok	.	.	.	.	??	.	??	ok	ok	.	no_ncog	.	.	.
21439	ok	ok	ok	ok	ok	ok	??	.	??	ok	ok	.	ok	ok	ok	.
21442	ok	ok	ok	.	ok	ok	??	.	??	ok	ok	.	ok	ok	.	.
21443	ok	ok	ok	.	ok	ok	??	ok	??	ok	ok	ok	ok	ok	.	ok
21444	ok	.	ok	ok	ok	ok	??	ok	??	ok	ok	ok	partial	.	ok	ok
21446	ok	ok	ok	ok	ok	ok	??	.	??	ok	ok	.	ok	ok	ok	.
21447	ok	ok	ok	ok	ok	ok	??	.	??	ok	ok	.	ok	ok	ok	.
21448	ok	ok	ok	ok	ok	ok	??	.	??	ok	ok	.	ok	ok	ok	.
21449	ok	ok	.	.	.	.	??	.	??	ok	ok	.	no_ncog	.	.	.
21450	ok	ok	ok	ok	ok	ok	??	.	??	ok	ok	.	ok	ok	ok	.
21452	ok	ok	ok	ok	ok	ok	??	.	??	ok	ok	.	ok	ok	ok	.
21459	ok	ok	ok	ok	ok	ok	??	.	??	ok	ok	.	ok	ok	ok	.
21461	ok	ok	ok	ok	ok	ok	??	ok	??	ok	ok	ok	ok	ok	ok	ok
21462	ok	ok	.	.	.	.	??	.	??	ok	ok	.	no_ncog	.	.	.
21463	ok	ok	ok	ok	ok	ok	??	.	??	ok	ok	.	ok	ok	ok	.
21464	ok	ok	ok	.	.	.	??	.	??	ok	ok	.	partial	ok	.	.
21466	ok	ok	ok	ok	.	.	??	.	??	ok	ok	.	partial	ok	ok	.
21467	ok	ok	ok	ok	ok	ok	??	ok	??	ok	ok	ok	ok	ok	ok	ok
21468	ok	ok	ok	ok	ok	ok	??	ok	??	ok	ok	ok	ok	ok	ok	ok
21470	ok	ok	.	.	.	.	??	.	??	ok	ok	.	no_ncog	.	.	.
21471	ok	ok	ok	ok	ok	ok	??	.	??	ok	ok	.	ok	ok	ok	.
21472	ok	ok	ok	ok	ok	ok	??	.	??	ok	ok	.	ok	ok	ok	.
21475	ok	ok	ok	ok	ok	ok	??	ok	??	ok	ok	ok	ok	ok	ok	ok
21476	ok	ok	ok	.	.	.	??	.	??	ok	ok	.	partial	ok	.	.
21477	ok	ok	ok	ok	ok	ok	??	ok	??	ok	ok	ok	ok	ok	ok	ok
21478	ok	ok	ok	ok	ok	ok	??	ok	??	ok	ok	ok	ok	ok	ok	ok
21479	ok	ok	ok	ok	ok	ok	??	ok	??	ok	ok	ok	ok	ok	ok	ok
21480	ok	ok	.	.	.	.	??	.	??	ok	ok	ok	no_ncog	.	.	.
21483	ok	ok	.	.	.	.	??	.	??	ok	ok	.	no_ncog	.	.	.
21484	ok	ok	ok	ok	ok	ok	??	ok	??	ok	ok	ok	ok	ok	ok	ok
21485	ok	ok	ok	ok	ok	ok	??	ok	??	ok	ok	ok	ok	ok	ok	ok
21488	ok	ok	ok	ok	ok	ok	??	ok	??	ok	ok	ok	ok	ok	ok	ok
21492	ok	ok	ok	ok	ok	ok	??	ok	??	ok	ok	ok	ok	ok	ok	ok
21495	ok	ok	ok	ok	ok	ok	??	ok	??	ok	ok	ok	ok	ok	ok	ok
21496	ok	ok	ok	ok	ok	ok	??	ok	??	ok	ok	ok	ok	ok	ok	ok
21501	ok	ok	ok	ok	ok	ok	??	.	??	ok	ok	.	ok	ok	ok	.
21503	ok	ok	ok	.	.	.	??	.	??	ok	ok	.	partial	ok	.	.
21504	ok	ok	ok	ok	ok	ok	??	ok	??	ok	ok	ok	ok	ok	ok	ok
21506	ok	ok	.	.	.	.	??	.	??	ok	ok	.	no_ncog	.	.	.
21509	ok	ok	ok	ok	ok	ok	??	.	??	ok	ok	.	ok	ok	ok	.
21510	ok	ok	.	.	.	.	??	.	??	ok	ok	.	no_ncog	.	.	.
21512	ok	ok	.	.	.	.	??	.	??	ok	ok	.	no_ncog	.	.	.
21513	ok	ok	ok	ok	ok	ok	??	.	??	ok	ok	.	ok	ok	ok	.
21514	ok	ok	ok	ok	ok	ok	??	ok	??	ok	ok	ok	ok	ok	ok	ok
21516	ok	ok	ok	ok	ok	ok	??	.	??	ok	ok	.	ok	ok	ok	.
21517	ok	ok	ok	.	ok	.	??	.	??	ok	ok	.	ok	ok	.	.
21520	ok	ok	ok	ok	ok	ok	??	.	??	ok	ok	.	ok	ok	ok	.
21531	ok	ok	ok	ok	ok	ok	??	.	??	ok	ok	.	ok	ok	ok	.
21532	ok	ok	ok	.	ok	ok	??	.	??	ok	ok	.	partial	ok	.	.
21533	ok	ok	.	.	.	.	??	.	??	ok	ok	.	no_ncog	.	.	.
21534	ok	ok	.	.	.	.	??	.	??	ok	ok	.	no_ncog	.	.	.
21536	ok	ok	.	.	.	.	??	.	??	ok	ok	.	no_ncog	.	.	.
21539	ok	ok	ok	ok	ok	ok	??	.	??	ok	ok	.	ok	ok	ok	.
21540	ok	ok	ok	ok	.	ok	??	.	??	ok	ok	.	partial	ok	ok	.
21544	ok	ok	ok	ok	ok	ok	??	.	??	ok	ok	.	ok	ok	ok	.
21547	ok	ok	.	.	.	.	??	.	??	ok	ok	.	no_ncog	.	.	.
21549	ok	ok	ok	ok	ok	ok	??	.	??	ok	ok	.	ok	ok	ok	.
21550	ok	ok	ok	.	ok	ok	??	.	??	ok	ok	.	partial	ok	.	.
21551	ok	ok	ok	.	ok	ok	??	.	??	ok	ok	.	partial	ok	.	.
21554	ok	ok	ok	ok	ok	ok	??	.	??	ok	ok	.	ok	ok	ok	.
21555	ok	ok	ok	ok	ok	ok	??	.	??	ok	ok	.	ok	ok	ok	.
21556	ok	ok	ok	ok	ok	ok	??	.	??	ok	ok	.	ok	ok	ok	.
21557	ok	ok	ok	.	ok	ok	??	.	??	ok	ok	.	partial	ok	.	.
21559	ok	ok	ok	ok	ok	ok	??	.	??	ok	ok	.	ok	ok	ok	.
21560	ok	ok	ok	ok	ok	ok	??	.	??	ok	ok	.	ok	ok	ok	.
21563	ok	ok	.	.	.	.	??	.	??	ok	ok	.	no_ncog	.	.	.
21564	ok	ok	ok	ok	ok	ok	??	.	??	ok	ok	.	ok	ok	ok	.
21565	ok	ok	ok	ok	ok	ok	??	.	??	ok	ok	.	ok	ok	ok	.
21566	ok	ok	ok	ok	ok	ok	??	.	??	ok	ok	.	ok	ok	ok	.
21568	ok	ok	ok	ok	ok	ok	??	.	??	ok	ok	.	ok	ok	ok	.
21570	ok	ok	ok	ok	ok	ok	??	.	??	ok	ok	.	ok	ok	ok	.
21571	ok	ok	.	.	.	.	??	.	??	ok	ok	.	no_ncog	.	.	.
21572	ok	ok	.	.	.	.	??	.	??	ok	ok	.	no_ncog	.	.	.
21574	ok	ok	ok	.	ok	ok	??	.	??	ok	ok	.	ok	ok	.	.
21577	ok	ok	ok	.	ok	ok	??	.	??	ok	ok	.	ok	ok	.	.
21578	ok	.	.	.	.	.	??	.	??	ok	ok	.	no_ncog	.	.	.
21579	ok	ok	ok	ok	ok	ok	??	.	??	ok	ok	.	ok	ok	ok	.
21583	ok	ok	ok	ok	.	ok	??	.	??	ok	ok	.	partial	ok	ok	.
21592	ok	ok	ok	.	ok	ok	??	.	??	ok	ok	.	ok	ok	.	.
30847	.	.	.	.	.	.	??	.	??	.	.	.	test_only	.	.	.
60778	.	.	.	.	.	.	??	.	??	.	.	.	test_only	.	.	.
0012SP23	ok	ok	ok	ok	ok	ok	??	ok	??	ok	ok	ok	ok	ok	ok	ok
001SP23	ok	ok	ok	ok	ok	ok	??	ok	??	ok	ok	ok	ok	ok	ok	ok
002SP23	ok	ok	.	ok	.	ok	??	ok	??	ok	ok	ok	partial	.	ok	.
003SP23	ok	ok	ok	ok	ok	ok	??	ok	??	ok	ok	ok	ok	ok	ok	ok
004SP23	ok	ok	ok	ok	ok	ok	??	ok	??	ok	ok	ok	ok	ok	ok	ok
005SP23	ok	ok	ok	ok	ok	ok	??	ok	??	ok	ok	ok	ok	ok	ok	ok
006SP23	ok	ok	ok	ok	ok	ok	??	ok	??	ok	ok	ok	ok	ok	ok	ok
007SP23	ok	ok	ok	ok	ok	ok	??	ok	??	ok	ok	ok	ok	ok	ok	ok
008SP23	ok	ok	ok	ok	ok	ok	??	ok	??	ok	ok	ok	ok	ok	ok	ok
009SP23	ok	ok	ok	ok	ok	ok	??	ok	??	ok	ok	ok	ok	ok	ok	ok
010SP23	ok	ok	ok	ok	ok	ok	??	ok	??	ok	ok	ok	ok	ok	ok	ok
011SP23	ok	ok	ok	ok	ok	ok	??	ok	??	ok	ok	ok	ok	ok	ok	ok
013SP23	ok	ok	ok	ok	ok	ok	??	ok	??	ok	ok	ok	ok	ok	ok	ok
014SP23	ok	ok	ok	ok	ok	ok	??	ok	??	ok	ok	ok	ok	ok	ok	ok
015SP23	ok	ok	ok	ok	ok	ok	??	ok	??	ok	ok	.	ok	ok	ok	.
016SP23	ok	ok	ok	ok	ok	ok	??	ok	??	ok	ok	ok	ok	ok	ok	ok
017SP23	ok	ok	ok	ok	ok	ok	??	ok	??	ok	ok	ok	ok	ok	ok	ok
018SP23	ok	ok	ok	ok	ok	ok	??	ok	??	ok	ok	ok	ok	ok	ok	ok
019SP23	ok	ok	ok	ok	ok	ok	??	ok	??	ok	ok	ok	ok	ok	ok	ok
020SP23	ok	ok	ok	ok	ok	ok	??	ok	??	ok	ok	ok	ok	ok	ok	ok
021SP23	ok	ok	ok	ok	ok	ok	??	ok	??	ok	ok	ok	ok	ok	ok	ok
id9999	ok	ok	ok	ok	ok	ok	??	ok	??	ok	ok	ok	ok	ok	ok	ok
id3943	ok	ok	.	.	ok	.	??	ok	??	ok	ok	ok	partial	.	.	.
id0073	ok	ok	ok	.	ok	ok	??	ok	??	ok	ok	ok	ok	ok	.	ok
id6541	ok	ok	ok	.	ok	ok	??	ok	??	ok	ok	ok	ok	ok	.	ok
id8892	ok	ok	ok	.	ok	ok	??	ok	??	ok	ok	ok	ok	ok	.	ok
id7521	ok	ok	ok	ok	ok	ok	??	ok	??	ok	ok	ok	ok	ok	ok	ok
id6505	ok	ok	ok	ok	ok	ok	??	ok	??	ok	ok	ok	ok	ok	ok	ok
id0036	ok	ok	.	.	.	.	??	ok	??	ok	ok	ok	no_ncog	.	.	.
id9286	ok	ok	ok	.	ok	ok	??	ok	??	ok	ok	ok	partial	ok	.	ok
id6923	ok	ok	ok	.	ok	ok	??	ok	??	ok	ok	ok	partial	ok	.	ok
id4472	ok	ok	ok	ok	ok	ok	??	ok	??	ok	ok	ok	partial	ok	ok	ok
id7739	.	.	.	ok	.	.	??	.	??	.	.	.	test_only	.	.	.
id7207	ok	ok	ok	ok	ok	ok	??	ok	??	ok	ok	ok	ok	ok	ok	ok
id5458	ok	ok	ok	ok	ok	ok	??	ok	??	ok	ok	ok	ok	ok	ok	ok
id3612	ok	.	ok	ok	ok	ok	??	ok	??	ok	ok	ok	partial	.	ok	ok
id8446	.	.	.	ok	.	.	??	.	??	.	.	.	test_only	.	.	.
id6649	ok	ok	ok	ok	ok	ok	??	ok	??	ok	ok	ok	ok	ok	ok	ok
id9660	ok	ok	ok	ok	ok	ok	??	ok	??	ok	ok	ok	ok	ok	ok	ok
id6984	ok	ok	ok	ok	ok	ok	??	ok	??	ok	ok	ok	ok	ok	ok	ok
id801918138	ok	ok	ok	ok	ok	ok	??	ok	??	ok	ok	ok	ok	ok	ok	ok
id5394	ok	ok	ok	.	.	ok	??	ok	??	ok	ok	ok	partial	ok	.	.
id8303	ok	ok	ok	ok	ok	ok	??	ok	??	ok	ok	ok	ok	ok	ok	ok
id5579	ok	ok	ok	ok	ok	ok	??	ok	??	ok	ok	ok	ok	ok	ok	ok
id2812	ok	ok	ok	ok	ok	ok	??	ok	??	ok	ok	ok	ok	ok	ok	ok
id3924	ok	ok	ok	ok	ok	ok	??	ok	??	ok	ok	ok	ok	ok	ok	ok
id8273	ok	ok	ok	ok	ok	ok	??	ok	??	ok	ok	ok	ok	ok	ok	ok
id8072	ok	ok	ok	ok	ok	ok	??	ok	??	ok	ok	ok	ok	ok	ok	ok
id6436	ok	ok	ok	ok	ok	ok	??	ok	??	ok	ok	ok	ok	ok	ok	ok
id1933	ok	ok	ok	ok	ok	ok	??	ok	??	ok	ok	ok	ok	ok	ok	ok
id2385	ok	ok	ok	ok	ok	ok	??	ok	??	ok	ok	ok	ok	ok	ok	ok
id6766	ok	ok	ok	ok	ok	ok	??	ok	??	ok	ok	ok	ok	ok	ok	ok
id4229	ok	ok	ok	ok	ok	ok	??	ok	??	ok	ok	ok	ok	ok	ok	ok

## Sheet: ncog_tasks
GNG_RespID	GNG_Session	GNG_TA_sourcefile	GNG_nGood	GNG_nShort	GNG_nGoTrials	GNG_nNoGoTrials	GNG_GoPctCorr	GNG_GoPctErr	GNG_NoGoPctCorr	GNG_NoGoPctErr	GNG_GoMeanRT	GNG_GoSD_RT	GNG_NoGoMeanRT	GNG_NoGoSD_RT	GNG_ProratedComErr	RPLT_RespID	RPLT_Session	RPLT_TA_sourcefile	RPLT_version	RPLT_nTotalCorrect	RPLT_nTotalIncorrect	RPLT_PctCorr_AcqReward	RPLT_PctCorr_AcqPunish	RPLT_meanRT_AcqRewardCorr	RPLT_meanRT_AcqPunishCorr	RPLT_meanRT_AcqRewardIncorr	RPLT_meanRT_AcqPunishIncorr	RPLT_PctCorr_RevReward	RPLT_PctCorr_RevPunish	RPLT_meanRT_RevRewardCorr	RPLT_meanRT_RevPunishCorr	RPLT_meanRT_RevRewardIncorr	RPLT_meanRT_RevPunishIncorr	RPLT_myTotal	EST_RespID	EST_Session	EST_TA_sourcefile	EST_nGood	EST_nLong	EST_nShort	EST_nBlue	EST_nRed	EST_PctCor_NEUT	EST_PctCor_NEG	EST_PctCor_SUI	EST_PctCor_SUICIDE	EST_CorrectMeanRT_NEUT	EST_FirstMeanRT_NEUT	EST_CorrectMeanRT_NEG
R_AvoCNVPDpoqssr7	1	Summary_GNG EC_incomplete.xlsx	150	0	123	27	99.187	0.813008	81.4815	18.5185	0.337762	0.0372346	0.2958	0.0134796	18.6703	.	.	.	.	.	.	.	.	.	.	.	.	.	.	.	.	.	.	.	.	.	.	.	.	.	.	.	.	.	.	.	.	.	.
R_2fs2c5dN2vU4jrM	1	Summary_GNG EC_November 19, 2022_10.26.xlsx	150	0	123	27	100	0	85.1852	14.8148	0.322667	0.0395065	0.2945	0.0165429	14.8148	R_1Kw4gBdWhd5TuGt	1	Summary_RPLT T4 EC_November 19, 2022_10.20.xlsx	T4	73	87	45	52.5	1.00917	0.905714	0.971636	1.10474	60	50	0.771	0.94335	0.64475	0.8317	75	R_2BxHSyZYH5QPwJu	1	Summary_EST EC_November 19, 2022_10.30.xlsx	72	0	0	36	36	87.5	91.6667	83.3333	50	0.595542	0.474708	0.558458
.	.	.	.	.	.	.	.	.	.	.	.	.	.	.	.	.	.	.	.	.	.	.	.	.	.	.	.	.	.	.	.	.	.	.	.	.	.	.	.	.	.	.	.	.	.	.	.	.	.
.	.	.	.	.	.	.	.	.	.	.	.	.	.	.	.	.	.	.	.	.	.	.	.	.	.	.	.	.	.	.	.	.	.	.	.	.	.	.	.	.	.	.	.	.	.	.	.	.	.
.	.	.	.	.	.	.	.	.	.	.	.	.	.	.	.	.	.	.	.	.	.	.	.	.	.	.	.	.	.	.	.	.	.	.	.	.	.	.	.	.	.	.	.	.	.	.	.	.	.
R_1jDhIsNcHwcS9Eb	1	Summary_GNG EC_incomplete.xlsx	150	0	123	27	97.561	2.43902	66.6667	33.3333	0.336175	0.0487033	0.279778	0.0282833	34.1667	.	.	.	.	.	.	.	.	.	.	.	.	.	.	.	.	.	.	.	.	.	.	.	.	.	.	.	.	.	.	.	.	.	.
.	.	.	.	.	.	.	.	.	.	.	.	.	.	.	.	.	.	.	.	.	.	.	.	.	.	.	.	.	.	.	.	.	.	.	.	.	.	.	.	.	.	.	.	.	.	.	.	.	.
R_2v0yJmJcumSMIOm	1	Summary_GNG incomplete.xlsx	150	0	123	27	97.561	2.43902	59.2593	40.7407	0.339583	0.0537607	0.306545	0.0187956	41.7593	R_2zYgLA5yzEPigDK	1	Summary_RPLT 11-2-21 - Final - T2_September 27, 2022_09.15.xlsx	T2	81	79	62.5	60	0.73592	0.738917	0.662933	0.879938	12.5	67.5	0.5818	0.766778	0.7196	0.630231	-125	R_1FakaYi6MfseWeF	1	Summary_EST 8-19-21 - Final_September 27, 2022_09.12.xlsx	72	0	0	36	36	100	100	95.8333	100	0.534875	0.534875	0.541917
.	.	.	.	.	.	.	.	.	.	.	.	.	.	.	.	.	.	.	.	.	.	.	.	.	.	.	.	.	.	.	.	.	.	.	.	.	.	.	.	.	.	.	.	.	.	.	.	.	.
R_1pnkqh59IEEOEDV	1	Summary_GNG 9-28-21 - Final_November 18, 2022_15.22.xlsx	150	0	123	27	99.187	0.813008	100	0	0.352197	0.0318272	.	.	0	R_3JEO0mgGxqhu3LS	1	Summary_RPLT 12-2-21 - Final - T3_November 21, 2022_14.05.xlsx	T3	91	69	57.5	47.5	0.985783	1.22558	0.804647	1.17514	45	42.5	0.376	0.475765	0.480318	0.403913	-25	R_2CQaIMXFDLrtSjx	1	Summary_EST 8-19-21 - Final_November 18, 2022_15.28.xlsx	72	0	0	36	36	91.6667	100	91.6667	100	0.834792	0.532083	0.521917
R_URBfYRdCsjFHnu9	1	Summary_GNG 9-28-21 - Final_November 18, 2022_15.22.xlsx	150	0	123	27	100	0	92.5926	7.40741	0.344333	0.0393327	0.301	0.0452548	7.40741	R_1isTRihCDv0vYQ9	1	Summary_RPLT 12-2-21 - Final - T3_November 21, 2022_14.05.xlsx	T3	69	91	52.5	55	0.182143	0.376864	0.432895	0.3265	42.5	47.5	0.174	0.285579	0.150261	0.152857	-175	R_1jqhqwjJnBzwMwp	1	Summary_EST 8-19-21 - Final_November 18, 2022_15.28.xlsx	72	0	0	36	36	91.6667	91.6667	100	100	0.588792	0.43825	0.561125
R_1M65nLHBwFsf6Cm	1	Summary_GNG 9-28-21 - Final_November 18, 2022_15.22.xlsx	149	1	123	26	96.748	3.25203	80.7692	19.2308	0.34421	0.0668854	0.2558	0.0343613	19.8772	R_CdhRnvnfsPgXrQR	1	Summary_RPLT 12-2-21 - Final - T5_November 18, 2022_15.34.xlsx	T5	79	81	87.5	72.5	0.816457	0.875414	1.0468	0.861636	2.5	45	0.451	0.718222	0.701744	0.937455	-175	R_2cBqHrNyOhuENTd	1	Summary_EST 8-19-21 - Final_November 18, 2022_15.28.xlsx	72	0	0	36	36	91.6667	91.6667	87.5	100	0.647458	0.494	0.536125
R_4MeVz6jeFAtkWUp	1	Summary_GNG 9-28-21 - Final_November 18, 2022_15.22.xlsx	149	1	123	26	98.374	1.62602	80.7692	19.2308	0.296496	0.0497733	0.2672	0.0363896	19.5486	R_3GCaPYgFkzGzzdM	1	Summary_RPLT 11-2-21 - Final - T2_September 27, 2022_09.15.xlsx	T2	56	104	45	80	0.615833	0.478906	0.542318	0.507125	37.5	47.5	0.317533	0.237368	0.32704	0.341524	0	R_238JJvVmfHbtQIj	1	Summary_EST 8-19-21 - Final_November 18, 2022_15.28.xlsx	72	0	0	36	36	87.5	83.3333	91.6667	100	0.542708	0.412292	0.731292
R_3CHmKrDqZLLstKY	1	Summary_GNG 9-28-21 - Final_November 18, 2022_15.22.xlsx	150	0	123	27	98.374	1.62602	92.5926	7.40741	0.320207	0.0450699	0.327	0.130108	7.52984	R_559mK3lxCSiTHBT	1	Summary_RPLT EC - T1_November 19, 2022_10.48.xlsx	T1	78	82	47.5	55	0.477053	1.36282	0.688905	0.625111	60	42.5	0.527125	0.480412	0.417812	0.472565	100	R_XulWfpd9634bZ05	1	Summary_EST 8-19-21 - Final_November 18, 2022_15.28.xlsx	72	0	0	36	36	91.6667	87.5	100	100	0.65225	0.43475	0.699292
.	.	.	.	.	.	.	.	.	.	.	.	.	.	.	.	.	.	.	.	.	.	.	.	.	.	.	.	.	.	.	.	.	.	.	.	.	.	.	.	.	.	.	.	.	.	.	.	.	.
.	.	.	.	.	.	.	.	.	.	.	.	.	.	.	.	.	.	.	.	.	.	.	.	.	.	.	.	.	.	.	.	.	.	.	.	.	.	.	.	.	.	.	.	.	.	.	.	.	.
R_2ttbmfx3L5BUmeq	1	Summary_GNG 9-28-21 - Final_November 18, 2022_15.22.xlsx	150	0	123	27	99.187	0.813008	77.7778	22.2222	0.33909	0.046599	0.3065	0.0361483	22.4044	R_uwiL6p7B6VBvqoh	1	Summary_RPLT 11-2-21 - Final - T2_September 27, 2022_09.15.xlsx	T2	84	76	45	50	0.8345	1.2645	0.942591	0.8312	42.5	52.5	0.381	0.326286	0.312217	0.374632	-200	R_27PtsqOjTvipXZV	1	Summary_EST 8-19-21 - Final_November 18, 2022_15.28.xlsx	72	0	0	36	36	91.6667	87.5	87.5	100	0.554083	0.423125	0.65725
.	.	.	.	.	.	.	.	.	.	.	.	.	.	.	.	.	.	.	.	.	.	.	.	.	.	.	.	.	.	.	.	.	.	.	.	.	.	.	.	.	.	.	.	.	.	.	.	.	.
R_1OkPRGNcxDdLBwn	1	Summary_GNG 9-28-21 - Final_November 18, 2022_15.22.xlsx	147	3	120	27	98.3333	1.66667	70.3704	29.6296	0.304975	0.0505404	0.27225	0.0269112	30.1318	R_3shmCxKD3BQLgAS	1	Summary_RPLT 12-2-21 - Final - T5_November 18, 2022_15.34.xlsx	T5	68	92	42.5	42.5	0.495235	0.544882	0.522087	0.562435	47.5	52.5	0.498105	0.485095	0.584714	0.937579	-50	R_2VIOEhdtsAMQK2Y	1	Summary_EST 8-19-21 - Final_November 18, 2022_15.28.xlsx	72	0	0	36	36	91.6667	83.3333	83.3333	75	0.577333	0.459083	0.835958
.	.	.	.	.	.	.	.	.	.	.	.	.	.	.	.	.	.	.	.	.	.	.	.	.	.	.	.	.	.	.	.	.	.	.	.	.	.	.	.	.	.	.	.	.	.	.	.	.	.
.	.	.	.	.	.	.	.	.	.	.	.	.	.	.	.	R_23ggF57mvbV2Q0k	1	Summary_RPLT 11-2-21 - Final - T2_September 27, 2022_09.15.xlsx	T2	75	85	60	57.5	1.36104	1.22696	1.2635	0.835824	55	55	0.790864	0.957955	0.912667	0.922611	225	.	.	.	.	.	.	.	.	.	.	.	.	.	.	.
R_2Xb5VQVNOlUb1Xr	1	Summary_GNG 9-28-21 - Final_November 18, 2022_15.22.xlsx	150	0	123	27	96.748	3.25203	96.2963	3.7037	0.349504	0.050941	0.235	.	3.8282	R_1NzzvXIC5xnDR0M	1	Summary_RPLT 12-2-21 - Final - T5_November 18, 2022_15.34.xlsx	T5	102	58	50	50	1.0421	0.86335	0.78565	0.82665	82.5	77.5	0.836485	0.915806	1.01986	0.942	350	R_eJWmLPMXfe44ta1	1	Summary_EST 8-19-21 - Final_November 18, 2022_15.28.xlsx	72	0	0	36	36	95.8333	95.8333	95.8333	75	0.547125	0.493	0.503375
.	.	.	.	.	.	.	.	.	.	.	.	.	.	.	.	.	.	.	.	.	.	.	.	.	.	.	.	.	.	.	.	.	.	.	.	.	.	.	.	.	.	.	.	.	.	.	.	.	.
R_2QM8OEF0jwWWYBk	1	Summary_GNG 9-28-21 - Final_November 18, 2022_15.22.xlsx	150	0	123	27	97.561	2.43902	92.5926	7.40741	0.331958	0.0480349	0.3155	0.0346482	7.59259	R_1Gi7sCGDybbY5wZ	1	Summary_RPLT 12-2-21 - Final - T3_November 21, 2022_14.05.xlsx	T3	74	86	70	75	1.1305	1.23327	0.850917	1.0201	55	90	0.674864	0.803472	0.709556	0.68275	800	R_1GOlLg16z2xHOn0	1	Summary_EST 8-19-21 - Final_November 18, 2022_15.28.xlsx	72	0	0	36	36	91.6667	91.6667	87.5	75	0.552167	0.408667	0.665458
R_RCy8dVGTJihJ7Gh	1	Summary_GNG 9-28-21 - Final_November 18, 2022_15.22.xlsx	149	1	122	27	98.3607	1.63934	88.8889	11.1111	0.454117	0.117355	0.431333	0.0863153	11.2963	.	.	.	.	.	.	.	.	.	.	.	.	.	.	.	.	.	.	.	R_segsYap6jjAeEYF	1	Summary_EST 8-19-21 - Final_November 18, 2022_15.28.xlsx	72	0	0	36	36	91.6667	95.8333	100	100	0.698	0.490792	0.638417
R_3kq7OhxurfsA8Jc	1	Summary_GNG 9-28-21 - Final_November 18, 2022_15.22.xlsx	150	0	123	27	79.6748	20.3252	100	0	0.432051	0.0443634	.	.	0	.	.	.	.	.	.	.	.	.	.	.	.	.	.	.	.	.	.	.	R_SBigCONDcWRnRbH	1	Summary_EST 8-19-21 - Final_November 18, 2022_15.28.xlsx	72	0	0	36	36	100	100	100	100	0.626833	0.626833	0.683375
R_1i9UADVDHPDjUqW	1	Summary_GNG 9-28-21 - Final_November 18, 2022_15.22.xlsx	150	0	123	27	99.187	0.813008	92.5926	7.40741	0.347352	0.051782	0.3175	0.0403051	7.46812	R_27yeiMCiO11aEHm	1	Summary_RPLT 11-2-21 - Final - T2_September 27, 2022_09.15.xlsx	T2	81	79	55	52.5	0.256727	0.214333	0.212444	0.207526	55	40	0.141409	0.125812	0.137444	0.116375	-225	R_1MYEulucrhMmdzC	1	Summary_EST 8-19-21 - Final_November 18, 2022_15.28.xlsx	72	0	0	36	36	95.8333	95.8333	95.8333	100	0.532458	0.461708	0.543542
R_1dtunpm762dyHIt	1	Summary_GNG 9-28-21 - Final_November 18, 2022_15.22.xlsx	150	0	123	27	99.187	0.813008	81.4815	18.5185	0.329918	0.0415385	0.2644	0.0236495	18.6703	R_2t9hTX1y2R72lrl	1	Summary_RPLT 12-2-21 - Final - T5_November 18, 2022_15.34.xlsx	T5	45	115	47.5	47.5	0.846579	1.11226	0.844905	0.780381	35	57.5	0.781857	0.61013	0.487769	0.437882	-175	R_3Ryd6uwLPtkApY3	1	Summary_EST 8-19-21 - Final_November 18, 2022_15.28.xlsx	71	0	0	36	35	87.5	86.9565	91.6667	75	0.695625	0.428125	0.782174
R_1OpxOWCuWtEkqXf	1	Summary_GNG 9-28-21 - Final_November 18, 2022_15.22.xlsx	149	1	122	27	91.8033	8.19672	62.963	37.037	0.348571	0.0500871	0.3218	0.0445591	40.3439	R_33vfUZjuKTNwnau	1	Summary_RPLT 12-2-21 - Final - T3_November 21, 2022_14.05.xlsx	T3	86	74	50	47.5	1.08505	1.09268	1.1567	1.0871	60	52.5	1.10583	1.09819	1.29787	1.22316	100	R_1Ow1j6Ghsffi6WU	1	Summary_EST 8-19-21 - Final_November 18, 2022_15.28.xlsx	72	0	0	36	36	95.8333	95.8333	83.3333	75	0.571208	0.519625	0.563667
R_sjol8Lj4MJcTiQV	1	Summary_GNG 9-28-21 - Final_November 18, 2022_15.22.xlsx	149	1	123	26	99.187	0.813008	84.6154	15.3846	0.302369	0.0421328	0.29775	0.101092	15.5107	R_sjSD8RauQeZogkp	1	Summary_RPLT 12-2-21 - Final - T3_November 21, 2022_14.05.xlsx	T3	106	54	32.5	50	0.281154	0.4042	0.359	0.34555	42.5	65	0.187647	0.129115	0.211565	0.197643	0	R_201J1Ys2r20nIVX	1	Summary_EST 8-19-21 - Final_November 18, 2022_15.28.xlsx	72	0	0	36	36	91.6667	91.6667	95.8333	100	0.62175	0.486375	0.702125
.	.	.	.	.	.	.	.	.	.	.	.	.	.	.	.	.	.	.	.	.	.	.	.	.	.	.	.	.	.	.	.	.	.	.	.	.	.	.	.	.	.	.	.	.	.	.	.	.	.
R_pMEZo1Vik7PzRXH	1	Summary_GNG 9-28-21 - Final_November 18, 2022_15.22.xlsx	149	1	123	26	89.4309	10.5691	50	50	0.319118	0.0615652	0.252077	0.025214	55.9091	R_1Dprhk4Bc9Gmjda	1	Summary_RPLT 12-2-21 - Final - T3_November 21, 2022_14.05.xlsx	T3	73	87	50	52.5	0.6343	0.379095	0.4462	0.527421	62.5	57.5	0.2984	0.498957	0.4398	0.353412	225	R_3DcPzz9Jy5voLXB	1	Summary_EST 8-19-21 - Final_November 18, 2022_15.28.xlsx	67	0	5	35	32	91.6667	81.8182	95.2381	100	0.808	0.506417	1.12973
R_ymViBbdJ3aqOcSJ	1	Summary_GNG 9-28-21 - Final_November 18, 2022_15.22.xlsx	150	0	123	27	97.561	2.43902	96.2963	3.7037	0.3731	0.0513905	0.399	.	3.7963	R_2YLIetl1B9rlm4C	1	Summary_RPLT 12-2-21 - Final - T3_November 21, 2022_14.05.xlsx	T3	79	81	55	57.5	0.600864	0.714217	0.652944	0.681647	40	60	0.377375	0.441	0.472833	0.46975	-75	R_RXF3Vf85yC53sYh	1	Summary_EST 8-19-21 - Final_November 18, 2022_15.28.xlsx	72	0	0	36	36	100	95.8333	100	100	0.531875	0.531875	0.5815
R_31iS5NzHIJNHQ2S	1	Summary_GNG 9-28-21 - Final_November 18, 2022_15.22.xlsx	144	6	118	26	97.4576	2.54237	73.0769	26.9231	0.301565	0.0504091	0.263143	0.0296335	27.6254	R_1eJilZDFJEq48Iz	1	Summary_RPLT 12-2-21 - Final - T3_November 21, 2022_14.05.xlsx	T3	61	99	35	47.5	0.1925	0.260421	0.401077	0.301714	60	60	0.150292	0.192542	0.11525	0.114187	25	R_3s0STqBktf7yaex	1	Summary_EST 8-19-21 - Final_November 18, 2022_15.28.xlsx	66	0	6	31	35	85.7143	85.7143	95.8333	100	0.561952	0.386095	0.466
R_2Ehl6J3mhu3CQMu	1	Summary_GNG 9-28-21 - Final_November 18, 2022_15.22.xlsx	148	2	121	27	97.5207	2.47934	96.2963	3.7037	0.306475	0.0416107	0.24	.	3.79787	R_qCNNR0W1vsaSzKx	1	Summary_RPLT 11-2-21 - Final - T2_September 27, 2022_09.15.xlsx	T2	80	80	45	47.5	0.303722	0.371842	0.288409	0.316286	47.5	40	0.337632	0.436812	0.269286	0.257208	-250	R_pmbMHsPAgjxsXUR	1	Summary_EST 8-19-21 - Final_November 18, 2022_15.28.xlsx	72	0	0	36	36	87.5	91.6667	100	100	0.564333	0.434333	0.520917
.	.	.	.	.	.	.	.	.	.	.	.	.	.	.	.	.	.	.	.	.	.	.	.	.	.	.	.	.	.	.	.	.	.	.	.	.	.	.	.	.	.	.	.	.	.	.	.	.	.
R_ctNrMMrjedcwFUJ	1	Summary_GNG 9-28-21 - Final_November 18, 2022_15.22.xlsx	142	8	117	25	85.4701	14.5299	60	40	0.33244	0.0591597	0.3076	0.0633845	46.8	R_3edYIP7l82u67S3	1	Summary_RPLT 12-2-21 - Final - T5_November 18, 2022_15.34.xlsx	T5	72	88	50	55	0.6065	0.537682	0.28145	0.456667	45	55	0.248889	0.386364	0.367182	0.305278	0	R_3LZSlSWyfoxspjZ	1	Summary_EST 8-19-21 - Final_November 18, 2022_15.28.xlsx	72	0	0	36	36	95.8333	100	95.8333	75	0.782208	0.633	0.734958
R_3NPzYzC5xeU4aBF	1	Summary_GNG incomplete.xlsx	143	7	116	27	93.9655	6.03448	62.963	37.037	0.318073	0.0541219	0.2739	0.0332347	39.4156	.	.	.	.	.	.	.	.	.	.	.	.	.	.	.	.	.	.	.	.	.	.	.	.	.	.	.	.	.	.	.	.	.	.
R_3RyWptejRR5EbJi	1	Summary_GNG 9-28-21 - Final_November 18, 2022_15.22.xlsx	146	4	121	25	96.6942	3.30579	64	36	0.352598	0.0513682	0.294889	0.0434927	37.2308	R_3qX1nl6cDup9EFQ	1	Summary_RPLT 12-2-21 - Final - T5_November 18, 2022_15.34.xlsx	T5	84	76	67.5	52.5	0.861037	0.782905	0.570692	0.823579	85	65	0.920676	0.937269	0.592333	1.02043	600	.	.	.	.	.	.	.	.	.	.	.	.	.	.	.
R_PLOehYcIsDzJf9L	1	Summary_GNG 9-28-21 - Final_November 18, 2022_15.22.xlsx	150	0	123	27	95.935	4.06504	96.2963	3.7037	0.370924	0.0541184	0.39	.	3.86064	R_2OMU2DtADzoTRcW	1	Summary_RPLT 11-2-21 - Final - T2_September 27, 2022_09.15.xlsx	T2	77	83	57.5	50	0.632348	0.58145	0.471647	0.6609	42.5	32.5	0.429765	0.401923	0.431565	0.451667	-275	R_9YaKLLOmoayrz7X	1	Summary_EST 8-19-21 - Final_September 27, 2022_09.12.xlsx	72	0	0	36	36	95.8333	87.5	91.6667	100	0.654417	0.560208	0.883375
R_1gjaT5nNyzM0tfL	1	Summary_GNG 9-28-21 - Final_November 18, 2022_15.22.xlsx	150	0	123	27	99.187	0.813008	100	0	0.315238	0.0489898	.	.	0	R_2CybmVEfKqf1Ufu	1	Summary_RPLT 11-2-21 - Final - T2_September 27, 2022_09.15.xlsx	T2	92	68	55	65	1.69291	1.5995	1.49628	1.6215	50	45	1.1722	1.59872	1.1894	1.60695	50	R_cvjcPK3zElfJ4NH	1	Summary_EST 8-19-21 - Final_September 27, 2022_09.12.xlsx	72	0	0	36	36	95.8333	95.8333	100	100	0.671917	0.529125	0.555583
.	.	.	.	.	.	.	.	.	.	.	.	.	.	.	.	.	.	.	.	.	.	.	.	.	.	.	.	.	.	.	.	.	.	.	.	.	.	.	.	.	.	.	.	.	.	.	.	.	.
R_2Vf3Zgb9KQaFYP9	1	Summary_GNG 9-28-21 - Final_November 18, 2022_15.22.xlsx	149	1	122	27	90.1639	9.83607	81.4815	18.5185	0.332764	0.0631577	0.2862	0.0183221	20.5387	R_3Ear3qjJ40VsHFD	1	Summary_RPLT 12-2-21 - Final - T3_November 21, 2022_14.05.xlsx	T3	101	59	60	42.5	0.507125	0.602824	0.487	0.413174	45	55	0.4395	0.393545	0.575636	0.703333	75	R_2DSpxUXMg87zaoS	1	EST_forwarded9May2023.xlsx	72	0	0	36	36	95.8333	95.8333	95.8333	100	0.6465	0.566833	0.614917
R_6hC9ONRUPq8ELct	1	Summary_GNG 9-28-21 - Final_November 18, 2022_15.22.xlsx	150	0	123	27	92.6829	7.31707	100	0	0.424895	0.0371996	.	.	0	R_OOjIMGhrfkKHJTP	1	Summary_RPLT 12-2-21 - Final - T5_November 18, 2022_15.34.xlsx	T5	101	59	47.5	52.5	0.748105	0.752905	0.90719	0.858211	62.5	90	0.62468	0.662917	0.625067	0.832	525	R_2s1Jlykdss5iD20	1	EST_forwarded9May2023.xlsx	72	0	0	36	36	100	95.8333	100	100	0.489667	0.489667	0.576708
R_3PqaoRrPJpH7Zop	1	Summary_GNG 9-28-21 - Final_November 18, 2022_15.22.xlsx	150	0	123	27	77.2358	22.7642	96.2963	3.7037	0.433053	0.0473705	0.337	.	4.79532	R_3dZjGIobpY0zmIo	1	Summary_RPLT 11-2-21 - Final - T2_September 27, 2022_09.15.xlsx	T2	84	76	37.5	65	1.5884	1.52573	1.66236	1.53771	42.5	45	1.15294	1.04406	1.15126	1.14109	-50	R_s6jmQli0IK2emGd	1	Summary_EST 8-19-21 - Final_September 27, 2022_09.12.xlsx	72	0	0	36	36	91.6667	95.8333	95.8333	75	0.742875	0.577833	0.677208
R_1gGxioFMC2PpJ6F	1	Summary_GNG incomplete.xlsx	150	0	123	27	92.6829	7.31707	88.8889	11.1111	0.363851	0.0533463	0.302667	0.0289194	11.9883	.	.	.	.	.	.	.	.	.	.	.	.	.	.	.	.	.	.	.	.	.	.	.	.	.	.	.	.	.	.	.	.	.	.
R_REK1L7w6veqhay5	1	Summary_GNG 9-28-21 - Final_November 18, 2022_15.22.xlsx	150	0	123	27	100	0	100	0	0.361033	0.0486125	.	.	0	R_2R4SSCqRBEx4vMp	1	Summary_RPLT 11-2-21 - Final - T2_September 27, 2022_09.15.xlsx	T2	89	71	52.5	55	0.844048	0.812591	1.22047	1.09456	42.5	52.5	0.630118	0.65381	0.692478	0.687842	-175	R_3O1RrdptTGOjGvi	1	Summary_EST 8-19-21 - Final_September 27, 2022_09.12.xlsx	72	0	0	36	36	100	100	100	100	0.591417	0.591417	0.548958
R_21ncHkfQhyiBt39	1	Summary_GNG 9-28-21 - Final_November 18, 2022_15.22.xlsx	150	0	123	27	97.561	2.43902	66.6667	33.3333	0.361317	0.0527265	0.315444	0.0402403	34.1667	R_232HSHY5qF3IhUe	1	Summary_RPLT 11-2-21 - Final - T2_September 27, 2022_09.15.xlsx	T2	81	79	47.5	57.5	1.00863	0.952957	1.03095	0.932235	55	42.5	0.760727	0.972176	0.708056	0.840565	-125	R_rj89Sq8FH8LkVNL	1	Summary_EST 8-19-21 - Final_September 27, 2022_09.12.xlsx	72	0	0	36	36	95.8333	95.8333	87.5	100	0.8755	0.704125	1.10204
R_1gqpwZJY08mFRmg	1	Summary_GNG 9-28-21 - Final_November 18, 2022_15.22.xlsx	150	0	123	27	95.935	4.06504	81.4815	18.5185	0.327169	0.055517	0.293	0.0604731	19.3032	R_3iVg9Orws2OBk9y	1	Summary_RPLT 11-2-21 - Final - T2_September 27, 2022_09.15.xlsx	T2	83	77	70	62.5	0.59925	0.62504	0.70825	0.5222	55	45	0.481591	0.728056	0.626444	0.654364	175	R_3DwNyYUSjMh2hPA	1	Summary_EST 8-19-21 - Final_September 27, 2022_09.12.xlsx	72	0	0	36	36	95.8333	95.8333	100	100	0.622083	0.5415	0.613167
.	.	.	.	.	.	.	.	.	.	.	.	.	.	.	.	.	.	.	.	.	.	.	.	.	.	.	.	.	.	.	.	.	.	.	.	.	.	.	.	.	.	.	.	.	.	.	.	.	.
.	.	.	.	.	.	.	.	.	.	.	.	.	.	.	.	.	.	.	.	.	.	.	.	.	.	.	.	.	.	.	.	.	.	.	.	.	.	.	.	.	.	.	.	.	.	.	.	.	.
R_3DuRM4EXhdIQzwv	1	Summary_GNG 9-28-21 - Final_November 18, 2022_15.22.xlsx	150	0	123	27	87.8049	12.1951	85.1852	14.8148	0.367148	0.0522964	0.367	0.097355	16.8724	R_oXpRol5E3rNXcQx	1	Summary_RPLT 11-2-21 - Final - T2_September 27, 2022_09.15.xlsx	T2	40	120	42.5	52.5	2.47965	3.06	1.17596	2.74437	47.5	52.5	1.09195	1.96157	1.10057	1.17905	-100	R_VL0DJ3G6pdYWXx7	1	Summary_EST 8-19-21 - Final_September 27, 2022_09.12.xlsx	70	2	0	34	36	81.8182	70.8333	83.3333	100	1.50336	0.889909	4.74454
R_8IENh85W59WYiul	1	Summary_GNG 9-28-21 - Final_November 18, 2022_15.22.xlsx	150	0	123	27	95.935	4.06504	92.5926	7.40741	0.358475	0.0535412	0.4	0.0452548	7.72128	R_T7xHDDwEoHzZwl3	1	Summary_RPLT 11-2-21 - Final - T2_September 27, 2022_09.15.xlsx	T2	81	79	30	45	1.46658	1.38922	1.09829	1.48568	95	87.5	0.950526	1.12911	1.163	1.256	625	R_3LXz6g3eOr29xS2	1	Summary_EST 8-19-21 - Final_September 27, 2022_09.12.xlsx	72	0	0	36	36	100	100	100	100	0.468	0.468	0.493583
R_spuj49FWEXjFljb	1	Summary_GNG 9-28-21 - Final_November 18, 2022_15.22.xlsx	150	0	123	27	99.187	0.813008	92.5926	7.40741	0.355328	0.0488765	0.258	0.0141421	7.46812	R_2QEhwc52JQBcYjm	1	Summary_RPLT 11-2-21 - Final - T2_September 27, 2022_09.15.xlsx	T2	82	78	50	52.5	0.8389	0.816619	1.04425	0.842789	40	42.5	0.539562	0.674706	0.454042	0.518565	-150	R_3kGudiq1pqUoMbX	1	Summary_EST 8-19-21 - Final_September 27, 2022_09.12.xlsx	72	0	0	36	36	95.8333	95.8333	95.8333	100	0.5885	0.502667	0.642917
R_24HInMEZC6sNZFM	1	Summary_GNG 9-28-21 - Final_November 18, 2022_15.22.xlsx	150	0	123	27	90.2439	9.7561	70.3704	29.6296	0.370072	0.046583	0.32975	0.0332039	32.8328	R_r6mR5zzRgH49KQp	1	Summary_RPLT 11-2-21 - Final - T2_September 27, 2022_09.15.xlsx	T2	65	95	42.5	82.5	0.896471	0.814939	0.896609	0.824	35	37.5	0.737214	0.937867	0.635731	0.54224	-225	R_Wifz2luY1CKmnPr	1	Summary_EST 8-19-21 - Final_September 27, 2022_09.12.xlsx	72	0	0	36	36	95.8333	100	100	100	0.643958	0.529333	0.57325
R_2cd8dOmGc1JPJ68	1	Summary_GNG 9-28-21 - Final_November 18, 2022_15.22.xlsx	147	3	120	27	96.6667	3.33333	74.0741	25.9259	0.337293	0.0459544	0.297429	0.0421064	26.8199	R_1oGa0LURa3TfJ1g	1	Summary_RPLT 11-2-21 - Final - T2_September 27, 2022_09.15.xlsx	T2	75	85	55	45	0.608682	0.677167	0.7765	0.843136	67.5	50	0.416333	0.50685	0.414923	0.57425	125	R_1pXyYCEvgf0z7ji	1	Summary_EST 8-19-21 - Final_September 27, 2022_09.12.xlsx	72	0	0	36	36	100	100	100	100	0.554375	0.554375	0.512625
R_2ALjylM3T3BYF9d	1	Summary_GNG 9-28-21 - Final_November 18, 2022_15.22.xlsx	149	1	122	27	99.1803	0.819672	96.2963	3.7037	0.34676	0.0506274	0.292	.	3.73431	R_3sB4RgBkv84udMp	1	Summary_RPLT 11-2-21 - Final - T2_September 27, 2022_09.15.xlsx	T2	85	75	50	52.5	1.3128	1.22419	1.5808	1.54074	57.5	32.5	0.672087	0.683923	0.694471	0.766704	75	R_3MyD8uE7dcRr3q6	1	Summary_EST 8-19-21 - Final_September 27, 2022_09.12.xlsx	72	0	0	36	36	100	100	100	100	0.592542	0.592542	0.584125
R_0vz5G8Xn6SHvod3	1	Summary_GNG 9-28-21 - Final_November 18, 2022_15.22.xlsx	150	0	123	27	99.187	0.813008	77.7778	22.2222	0.325172	0.0482615	0.315	0.0233581	22.4044	R_RxLjBmd0uZktiVP	1	Summary_RPLT EC - T1_November 19, 2022_10.48.xlsx	T1	86	74	45	52.5	1.07806	0.792667	0.607	0.769158	37.5	60	0.443533	0.451208	0.47212	0.411875	0	R_302HkaJcT2dkmPb	1	EST_forwarded9May2023.xlsx	72	0	0	36	36	91.6667	91.6667	91.6667	100	0.586083	0.459667	0.550125
R_BG6RvrFvZpuuDuh	1	Summary_GNG_forwarded9May2023.xlsx	149	1	122	27	67.2131	32.7869	85.1852	14.8148	0.354866	0.0682495	0.316	0.0413683	126.739	.	.	.	.	.	.	.	.	.	.	.	.	.	.	.	.	.	.	.	.	.	.	.	.	.	.	.	.	.	.	.	.	.	.
R_3O0wHF6lZ3lTEZj	1	Summary_GNG 9-28-21 - Final_November 18, 2022_15.22.xlsx	147	3	121	26	95.8678	4.13223	53.8462	46.1538	0.332741	0.0627363	0.287917	0.0502421	48.1432	R_1Nf7YW2CPd2Oh2i	1	Summary_RPLT 11-2-21 - Final - T2_September 27, 2022_09.15.xlsx	T2	88	72	60	50	0.801083	0.764	0.655375	0.722	40	50	0.456125	0.559	0.418958	0.38585	150	R_yJa8ofR3fVdrrZT	1	Summary_EST 8-19-21 - Final_September 27, 2022_09.12.xlsx	72	0	0	36	36	95.8333	87.5	87.5	75	0.554417	0.478042	0.788125
.	.	.	.	.	.	.	.	.	.	.	.	.	.	.	.	.	.	.	.	.	.	.	.	.	.	.	.	.	.	.	.	.	.	.	.	.	.	.	.	.	.	.	.	.	.	.	.	.	.
R_1Nk3nyfLw6Voyav	1	Summary_GNG 9-28-21 - Final_November 18, 2022_15.22.xlsx	150	0	123	27	94.3089	5.69106	96.2963	3.7037	0.358914	0.0512616	0.29	.	3.9272	R_33EkbWX2ZnTieYL	1	Summary_RPLT 12-2-21 - Final - T3_November 21, 2022_14.05.xlsx	T3	77	83	12.5	52.5	1.4408	1.33176	1.26137	1.50584	100	77.5	0.812975	1.17884	.	1.30778	575	R_2bVoOOe8lwPYrrc	1	EST_forwarded9May2023.xlsx	72	0	0	36	36	100	100	100	100	0.469333	0.469333	0.491042
.	.	.	.	.	.	.	.	.	.	.	.	.	.	.	.	.	.	.	.	.	.	.	.	.	.	.	.	.	.	.	.	.	.	.	.	.	.	.	.	.	.	.	.	.	.	.	.	.	.
.	.	.	.	.	.	.	.	.	.	.	.	.	.	.	.	.	.	.	.	.	.	.	.	.	.	.	.	.	.	.	.	.	.	.	.	.	.	.	.	.	.	.	.	.	.	.	.	.	.
R_2Cex4Yi1P9mXC2Z	1	Summary_GNG 9-28-21 - Final_November 18, 2022_15.22.xlsx	150	0	123	27	98.374	1.62602	100	0	0.351628	0.0295444	.	.	0	R_29dp9bzmP4cg0Ks	1	Summary_RPLT 12-2-21 - Final - T5_November 18, 2022_15.34.xlsx	T5	74	86	50	47.5	0.4229	0.384421	0.4236	0.497524	52.5	35	0.223619	0.255643	0.167105	0.189615	-100	R_27ExKHUPjQltQYu	1	EST_forwarded9May2023.xlsx	72	0	0	36	36	100	91.6667	91.6667	100	0.436333	0.436333	0.595833
R_Ah5eELLAuTTGYIF	1	Summary_GNG 9-28-21 - Final_November 18, 2022_15.22.xlsx	150	0	123	27	95.935	4.06504	88.8889	11.1111	0.317356	0.0482535	0.307667	0.00404145	11.5819	R_31XBVQLejOcDHsL	1	Summary_RPLT 11-2-21 - Final - T2_September 27, 2022_09.15.xlsx	T2	95	65	47.5	47.5	0.414158	0.390211	0.371381	0.455286	37.5	35	0.2574	0.300286	0.2266	0.355615	-375	R_1l497lydjFWnWmR	1	Summary_EST 8-19-21 - Final_September 27, 2022_09.12.xlsx	72	0	0	36	36	91.6667	87.5	95.8333	100	0.5835	0.426	0.660625
R_27BVbIGltsIwsL2	1	Summary_GNG 9-28-21 - Final_November 18, 2022_15.22.xlsx	149	1	122	27	93.4426	6.55738	92.5926	7.40741	0.370289	0.0516168	0.4015	0.0940452	7.92723	R_3pne2tNxdFK4is1	1	Summary_RPLT 12-2-21 - Final - T3_November 21, 2022_14.05.xlsx	T3	82	78	92.5	55	0.924622	1.07641	0.34	0.988222	30	62.5	0.409583	0.5674	0.607	0.608733	100	R_122PVBJ5p1kSr4M	1	EST_forwarded9May2023.xlsx	72	0	0	36	36	91.6667	95.8333	95.8333	100	0.651292	0.499333	0.573667
R_VXrVBY0beOd3Gut	1	Summary_GNG incomplete.xlsx	149	1	123	26	100	0	88.4615	11.5385	0.322992	0.0402092	0.291333	0.0614356	11.5385	.	.	.	.	.	.	.	.	.	.	.	.	.	.	.	.	.	.	.	R_3Pd8BYLrCBKGR6N	1	Summary_EST incomplete.xlsx	72	0	0	36	36	95.8333	87.5	91.6667	100	0.585917	0.5045	0.696417
R_1fel36BTOR8VDAy	1	Summary_GNG 9-28-21 - Final_November 18, 2022_15.22.xlsx	150	0	123	27	95.935	4.06504	88.8889	11.1111	0.353322	0.0550661	0.272667	0.0251462	11.5819	R_1ePNetpyBNMA4Sf	1	Summary_RPLT 12-2-21 - Final - T3_November 21, 2022_14.05.xlsx	T3	77	83	47.5	40	2.06832	1.8555	3.15576	2.66654	45	45	1.04178	1.2425	1.52273	1.38864	-125	R_DUeRmOILVlv8XQJ	1	Summary_lost data EST 8-19-21 - Final_April 28, 2023_07.24.xlsx	72	0	0	36	36	100	100	91.6667	100	0.5165	0.5165	0.551583
R_3fU9vFoDBaJIXWC	1	Summary_GNG 9-28-21 - Final_November 18, 2022_15.22.xlsx	150	0	123	27	91.0569	8.94309	85.1852	14.8148	0.38425	0.0490158	0.37025	0.055512	16.2698	R_1Q9Go3oLjax2P2F	1	Summary_RPLT 12-2-21 - Final - T3_November 21, 2022_14.05.xlsx	T3	97	63	55	50	1.13573	1.4644	0.962778	1.3439	55	42.5	0.716318	0.902353	0.781111	1.14635	-75	R_2780sdtIjZHz4Ea	1	Summary_lost data EST 8-19-21 - Final_April 28, 2023_07.24.xlsx	72	0	0	36	36	70.8333	91.6667	75	75	1.38496	0.611625	0.740958
R_3PtKJkhx9xSx8EW	1	Summary_GNG incomplete.xlsx	150	0	123	27	100	0	96.2963	3.7037	0.306976	0.0456308	0.297	.	3.7037	.	.	.	.	.	.	.	.	.	.	.	.	.	.	.	.	.	.	.	R_3pqVGnQPW7Hb3mp	1	Summary_EST incomplete.xlsx	72	0	0	36	36	100	100	100	100	0.444542	0.444542	0.445875
.	.	.	.	.	.	.	.	.	.	.	.	.	.	.	.	.	.	.	.	.	.	.	.	.	.	.	.	.	.	.	.	.	.	.	.	.	.	.	.	.	.	.	.	.	.	.	.	.	.
.	.	.	.	.	.	.	.	.	.	.	.	.	.	.	.	.	.	.	.	.	.	.	.	.	.	.	.	.	.	.	.	.	.	.	.	.	.	.	.	.	.	.	.	.	.	.	.	.	.
.	.	.	.	.	.	.	.	.	.	.	.	.	.	.	.	.	.	.	.	.	.	.	.	.	.	.	.	.	.	.	.	.	.	.	.	.	.	.	.	.	.	.	.	.	.	.	.	.	.
R_2bMteyI80LloLtf	1	Summary_GNG 9-28-21 - Final_November 18, 2022_15.22.xlsx	148	2	122	26	98.3607	1.63934	84.6154	15.3846	0.304792	0.0420412	0.2675	0.0353129	15.641	R_TcME0Chqo42FWlH	1	Summary_RPLT 12-2-21 - Final - T3_November 21, 2022_14.05.xlsx	T3	87	73	42.5	45	0.282235	0.201889	0.204087	0.583182	62.5	32.5	0.18332	0.166846	0.1376	0.100667	-125	R_D2HtNseVw1MoTVT	1	Summary_lost data EST 8-19-21 - Final_April 28, 2023_07.24.xlsx	70	0	2	35	35	90.9091	91.6667	91.6667	100	0.497182	0.414545	0.474625
R_spMzEVBu0VhAq5j	1	Summary_GNG 9-28-21 - Final_November 18, 2022_15.22.xlsx	150	0	123	27	95.122	4.87805	96.2963	3.7037	0.359231	0.0499456	0.331	.	3.89364	R_VP6TCE12Ol9iaad	1	Summary_RPLT 12-2-21 - Final - T5_November 18, 2022_15.34.xlsx	T5	44	116	47.5	67.5	0.809632	1.07811	0.844429	1.07469	47.5	82.5	0.605526	0.801697	0.634286	0.749286	250	.	.	.	.	.	.	.	.	.	.	.	.	.	.	.
R_3fIPtVI4lHBClWl	1	Summary_GNG 9-28-21 - Final_November 18, 2022_15.22.xlsx	150	0	123	27	100	0	96.2963	3.7037	0.367528	0.0375223	0.316	.	3.7037	R_2VmWLkF6DtTp5q3	1	Summary_RPLT 12-2-21 - Final - T5_November 18, 2022_15.34.xlsx	T5	68	92	47.5	57.5	0.918526	1.50957	1.068	1.16235	60	60	0.38075	0.453208	0.402687	0.352687	300	R_puvnIrwHgKWOutP	1	Summary_lost data EST 8-19-21 - Final_April 28, 2023_07.24.xlsx	72	0	0	36	36	91.6667	100	100	100	0.56375	0.393708	0.43675
.	.	.	.	.	.	.	.	.	.	.	.	.	.	.	.	.	.	.	.	.	.	.	.	.	.	.	.	.	.	.	.	.	.	.	.	.	.	.	.	.	.	.	.	.	.	.	.	.	.
R_2YnrrULEZ2HPwP7	1	Summary_GNG 9-28-21 - Final_November 18, 2022_15.22.xlsx	150	0	123	27	2.43902	97.561	100	0	0.496667	0.0092376	.	.	0	R_1Lhe8pNzSUuqokc	1	Summary_RPLT 12-2-21 - Final - T5_November 18, 2022_15.34.xlsx	T5	83	77	47.5	45	1.55421	1.49278	1.65319	1.47491	20	70	1.708	1.41457	1.023	1.27783	-75	R_3O0nPtWV8QVvdrv	1	Summary_lost data EST 8-19-21 - Final_April 28, 2023_07.24.xlsx	72	0	0	36	36	95.8333	100	91.6667	100	0.622333	0.614	0.63775
R_1r17gLHpwZNtJ83	1	Summary_GNG 9-28-21 - Final_November 18, 2022_15.22.xlsx	150	0	123	27	98.374	1.62602	96.2963	3.7037	0.352901	0.041273	0.28	.	3.76492	.	.	.	.	.	.	.	.	.	.	.	.	.	.	.	.	.	.	.	R_sFNswi1TSqPbs1X	1	Summary_lost data EST 8-19-21 - Final_April 28, 2023_07.24.xlsx	72	0	0	36	36	100	95.8333	100	100	0.439083	0.439083	0.574833
R_1r1QQTDLf5ulOsu	1	Summary_GNG 9-28-21 - Final_November 18, 2022_15.22.xlsx	148	2	121	27	100	0	92.5926	7.40741	0.30095	0.0403451	0.2825	0.000707107	7.40741	.	.	.	.	.	.	.	.	.	.	.	.	.	.	.	.	.	.	.	R_2OYGihrLXvSH7cy	1	Summary_lost data EST 8-19-21 - Final_April 28, 2023_07.24.xlsx	72	0	0	36	36	87.5	91.6667	100	100	0.582667	0.418917	0.507583
R_1n7RF5WYA6OK4LY	1	Summary_GNG 9-28-21 - Final_November 18, 2022_15.22.xlsx	150	0	123	27	98.374	1.62602	88.8889	11.1111	0.295298	0.0413626	0.257	0.0372693	11.2948	R_2rHm3P2OKfDZJXu	1	Summary_RPLT 12-2-21 - Final - T3_November 21, 2022_14.05.xlsx	T3	77	83	42.5	70	1.42382	1.14064	1.40478	1.89742	82.5	67.5	1.10755	1.16611	0.937571	0.794308	575	R_338PEOfZQgnBCUq	1	Summary_lost data EST 8-19-21 - Final_April 28, 2023_07.24.xlsx	72	0	0	36	36	95.8333	100	95.8333	100	0.552958	0.468958	0.483083
R_2xxRJBhOctPMosc	1	Summary_GNG 9-28-21 - Final_November 18, 2022_15.22.xlsx	138	12	112	26	100	0	84.6154	15.3846	0.260964	0.0445815	0.22325	0.00320156	15.3846	R_3qOrhIlR92z1S2u	1	Summary_RPLT 12-2-21 - Final - T3_November 21, 2022_14.05.xlsx	T3	97	63	65	65	0.998385	1.20012	1.39557	1.01971	32.5	90	0.682462	0.909139	0.74237	0.53575	425	R_1Ka8rRSePMWoG0k	1	Summary_lost data EST 8-19-21 - Final_April 28, 2023_07.24.xlsx	71	0	1	36	35	95.6522	87.5	100	100	0.527696	0.433783	0.639125
R_3gShT3OXrXwnmaK	1	Summary_GNG 9-28-21 - Final_November 18, 2022_15.22.xlsx	149	1	122	27	97.541	2.45902	96.2963	3.7037	0.367193	0.0487511	0.362	.	3.79707	R_1Owwf0Kdi70TAS6	1	Summary_RPLT 12-2-21 - Final - T3_November 21, 2022_14.05.xlsx	T3	79	81	45	60	0.228889	0.324417	0.379864	0.328813	50	32.5	0.1205	0.110615	0.2292	0.131222	-25	R_sHZygMFnD80YjZf	1	Summary_lost data EST 8-19-21 - Final_April 28, 2023_07.24.xlsx	72	0	0	36	36	75	95.8333	83.3333	75	0.645875	0.37225	0.410667
R_ZmXrPfHVwakxYBz	1	Summary_GNG 9-28-21 - Final_November 18, 2022_15.22.xlsx	150	0	123	27	99.187	0.813008	96.2963	3.7037	0.355008	0.0408625	0.331	.	3.73406	.	.	.	.	.	.	.	.	.	.	.	.	.	.	.	.	.	.	.	R_29m07KVBZTvg1c8	1	Summary_lost data EST 8-19-21 - Final_April 28, 2023_07.24.xlsx	72	0	0	36	36	100	100	100	100	0.429625	0.429625	0.451458
R_3Oq5RxsNoRx1VWp	1	Summary_GNG 9-28-21 - Final_November 18, 2022_15.22.xlsx	150	0	123	27	92.6829	7.31707	77.7778	22.2222	0.370009	0.0586922	0.3315	0.0674233	23.9766	R_2dtpQgAdiRgMCKr	1	Summary_RPLT 12-2-21 - Final - T5_November 18, 2022_15.34.xlsx	T5	89	71	42.5	52.5	2.63124	1.94205	2.11474	1.64137	55	47.5	1.63109	1.19137	1.86394	2.44552	-25	R_1hG3380lDBb4Rvx	1	Summary_lost data EST 8-19-21 - Final_April 28, 2023_07.24.xlsx	72	0	0	36	36	91.6667	83.3333	95.8333	100	0.920167	0.686333	1.32975
R_2c72XPvZGSQyeBy	1	Summary_GNG 9-28-21 - Final_November 18, 2022_15.22.xlsx	149	1	122	27	92.623	7.37705	77.7778	22.2222	0.380956	0.0555419	0.3325	0.0260211	23.9921	R_bkDVkTglVI9XxkJ	1	Summary_RPLT 12-2-21 - Final - T5_November 18, 2022_15.34.xlsx	T5	94	66	62.5	60	1.2434	1.08233	1.02673	0.885312	47.5	40	0.243684	0.310688	0.246619	0.285	0	R_3r0u5SywA9chplK	1	Summary_lost data EST 8-19-21 - Final_April 28, 2023_07.24.xlsx	72	0	0	36	36	87.5	91.6667	87.5	75	0.840708	0.693042	0.748708
.	.	.	.	.	.	.	.	.	.	.	.	.	.	.	.	.	.	.	.	.	.	.	.	.	.	.	.	.	.	.	.	.	.	.	.	.	.	.	.	.	.	.	.	.	.	.	.	.	.
R_3nc1sNhUxRmHCbw	1	Summary_GNG 9-28-21 - Final_November 18, 2022_15.22.xlsx	148	2	122	26	88.5246	11.4754	92.3077	7.69231	0.382009	0.051174	0.312	0.0226274	8.68946	R_2QETclfU3rL6V06	1	Summary_RPLT 12-2-21 - Final - T5_November 18, 2022_15.34.xlsx	T5	77	83	35	45	0.659857	0.602667	0.733462	0.938727	70	62.5	1.01118	0.91128	0.62075	0.8892	125	R_cInZWoEKByG6ziF	1	Summary_lost data EST 8-19-21 - Final_April 28, 2023_07.24.xlsx	72	0	0	36	36	91.6667	95.8333	95.8333	100	0.870625	0.605208	0.810458
R_2TLhrJjrnsaSNIv	1	Summary_GNG 9-28-21 - Final_November 18, 2022_15.22.xlsx	150	0	123	27	99.187	0.813008	88.8889	11.1111	0.350262	0.0443709	0.369	0.0248797	11.2022	R_2CQCncdTziJ0Mi5	1	Summary_RPLT 12-2-21 - Final - T5_November 18, 2022_15.34.xlsx	T5	114	46	52.5	75	0.805857	0.764767	0.613947	0.9839	50	67.5	0.54275	1.00007	0.5684	0.883923	300	R_27sah2FFNzgGwIA	1	Summary_lost data EST 8-19-21 - Final_April 28, 2023_07.24.xlsx	72	0	0	36	36	100	91.6667	100	100	0.492375	0.492375	0.664833
R_233lyZhbGNw3V2j	1	Summary_GNG 9-28-21 - Final_November 18, 2022_15.22.xlsx	148	2	122	26	95.082	4.91803	88.4615	11.5385	0.320509	0.0603387	0.266333	0.0422532	12.1353	R_8vTFdzPNmBwrcAh	1	Summary_RPLT 12-2-21 - Final - T5_November 18, 2022_15.34.xlsx	T5	84	76	45	50	1.14494	0.8255	0.975773	1.0614	35	50	0.409357	0.39405	0.480731	0.4147	-150	R_1FR0l6FnImScRh5	1	Summary_lost data EST 8-19-21 - Final_April 28, 2023_07.24.xlsx	72	0	0	36	36	100	100	100	100	0.684	0.684	0.639125
R_OfJlYYBmk18D59n	1	Summary_GNG 9-28-21 - Final_November 18, 2022_15.22.xlsx	150	0	123	27	98.374	1.62602	85.1852	14.8148	0.322124	0.0475602	0.2855	0.0192094	15.0597	R_3h0K7C6tukkR8uH	1	Summary_RPLT 12-2-21 - Final - T5_November 18, 2022_15.34.xlsx	T5	91	69	35	60	0.325	0.361792	0.3765	0.306312	80	52.5	0.506625	0.698381	0.321	0.462684	225	R_XhpIwJR0dacPmRH	1	Summary_lost data EST 8-19-21 - Final_April 28, 2023_07.24.xlsx	72	0	0	36	36	87.5	91.6667	87.5	100	0.629292	0.454583	0.565542
R_1QJDSCcGrsNPmca	1	Summary_GNG 9-28-21 - Final_November 18, 2022_15.22.xlsx	145	5	119	26	94.1176	5.88235	80.7692	19.2308	0.322018	0.0532201	0.287	0.041994	20.4327	R_1OE4fyKM7q5xdlW	1	Summary_RPLT 12-2-21 - Final - T5_November 18, 2022_15.34.xlsx	T5	74	86	52.5	62.5	0.620381	0.76328	0.769895	1.08133	47.5	52.5	0.419263	0.748286	0.962571	0.565368	100	R_3OoesK3fcQd7OA2	1	EST_forwarded9May2023.xlsx	72	0	0	36	36	100	100	100	100	0.542958	0.542958	0.610917
.	.	.	.	.	.	.	.	.	.	.	.	.	.	.	.	.	.	.	.	.	.	.	.	.	.	.	.	.	.	.	.	.	.	.	.	.	.	.	.	.	.	.	.	.	.	.	.	.	.
.	.	.	.	.	.	.	.	.	.	.	.	.	.	.	.	.	.	.	.	.	.	.	.	.	.	.	.	.	.	.	.	.	.	.	.	.	.	.	.	.	.	.	.	.	.	.	.	.	.
R_2c1I9XlACMlLPAS	1	Summary_GNG 9-28-21 - Final_November 18, 2022_15.22.xlsx	149	1	122	27	100	0	85.1852	14.8148	0.291213	0.0401479	0.23725	0.0174619	14.8148	.	.	.	.	.	.	.	.	.	.	.	.	.	.	.	.	.	.	.	R_2BrP3756vgcb3qD	1	EST_forwarded9May2023.xlsx	70	0	2	35	35	91.3043	86.9565	95.8333	100	0.548478	0.350043	0.592174
R_1qWYkNpN3cgodbj	1	Summary_GNG 9-28-21 - Final_November 18, 2022_15.22.xlsx	147	3	121	26	95.0413	4.95868	69.2308	30.7692	0.323122	0.0713541	0.278375	0.052443	32.3746	.	.	.	.	.	.	.	.	.	.	.	.	.	.	.	.	.	.	.	R_yrQ1UhGas72LVfP	1	EST_forwarded9May2023.xlsx	72	0	0	36	36	91.6667	91.6667	95.8333	100	0.669833	0.475375	0.572667
.	.	.	.	.	.	.	.	.	.	.	.	.	.	.	.	.	.	.	.	.	.	.	.	.	.	.	.	.	.	.	.	.	.	.	.	.	.	.	.	.	.	.	.	.	.	.	.	.	.
R_1FqWCwHcZkKMgDD	1	Summary_GNG 9-28-21 - Final_November 18, 2022_15.22.xlsx	149	1	122	27	94.2623	5.7377	88.8889	11.1111	0.396052	0.0476375	0.331333	0.0459601	11.7874	R_AcVXQQSxFU0nOzT	1	Summary_RPLT EC - T1_November 19, 2022_10.48.xlsx	T1	92	68	57.5	52.5	2.87852	1.21076	1.89171	2.37768	52.5	67.5	0.541952	0.713556	3.21347	0.541538	200	R_1P7XBk13huDOzD3	1	EST_forwarded9May2023.xlsx	72	0	0	36	36	100	100	95.8333	100	0.583833	0.583833	0.626875
R_3D0kcLxQQ8W83yo	1	Summary_GNG 9-28-21 - Final_November 18, 2022_15.22.xlsx	139	11	112	27	100	0	85.1852	14.8148	0.284062	0.0475143	0.25825	0.0370709	14.8148	R_2tDr6ohwaV0tQac	1	Summary_RPLT EC - T1_November 19, 2022_10.48.xlsx	T1	82	78	50	57.5	0.89705	1.24435	0.97515	1.04565	55	57.5	0.359409	0.41613	0.485556	0.508471	-150	.	.	.	.	.	.	.	.	.	.	.	.	.	.	.
R_PYALhDLdLd5bUVX	1	Summary_GNG incomplete.xlsx	150	0	123	27	1.62602	98.374	100	0	0.3075	0.0346482	.	.	0	.	.	.	.	.	.	.	.	.	.	.	.	.	.	.	.	.	.	.	R_2f3x0kZzRRUBBW2	1	Summary_EST incomplete.xlsx	72	0	0	36	36	91.6667	100	91.6667	100	0.642375	0.527125	0.575
.	.	.	.	.	.	.	.	.	.	.	.	.	.	.	.	.	.	.	.	.	.	.	.	.	.	.	.	.	.	.	.	.	.	.	.	.	.	.	.	.	.	.	.	.	.	.	.	.	.
.	.	.	.	.	.	.	.	.	.	.	.	.	.	.	.	.	.	.	.	.	.	.	.	.	.	.	.	.	.	.	.	.	.	.	.	.	.	.	.	.	.	.	.	.	.	.	.	.	.
R_3mdxHPDn8zuAJdq	1	Summary_GNG EC_April 24, 2023_08.14.xlsx	150	0	123	27	91.0569	8.94309	92.5926	7.40741	0.391732	0.0438981	0.324	0.00141421	8.13492	R_0If4rYuHpqePYbv	1	Summary_RPLT T4 EC_April 24, 2023_09.46.xlsx	T4	92	68	47.5	60	0.578895	1.02746	0.991048	0.655875	45	52.5	0.316556	0.547	0.275727	0.430789	0	R_1DCt57BTE0bdeDg	1	Summary_EST EC_April 24, 2023_08.11.xlsx	72	0	0	36	36	100	100	100	100	0.628333	0.628333	0.665958
R_3IbLs3NRKiPdfDi	1	Summary_GNG EC_April 24, 2023_08.14.xlsx	145	5	119	26	98.3193	1.68067	46.1538	53.8462	0.347513	0.0488269	0.330571	0.0514374	54.7666	R_2bPCEvfGTAIXpO3	1	Summary_RPLT T4 EC_April 24, 2023_09.46.xlsx	T4	70	90	52.5	47.5	0.466952	0.439526	0.624579	0.541429	62.5	67.5	0.20604	0.162444	0.157667	0.158692	150	R_234ClbwkxGg7gJE	1	Summary_EST EC_April 24, 2023_08.11.xlsx	72	0	0	36	36	91.6667	75	87.5	100	0.58325	0.445	1.03092
.	.	.	.	.	.	.	.	.	.	.	.	.	.	.	.	R_ysTGydlISFDlAs1	1	Summary_RPLT EC - T1_April 24, 2023_08.20.xlsx	T1	51	109	57.5	47.5	0.801435	0.762684	0.645647	0.683	45	42.5	0.485333	0.447294	0.4075	0.53087	-175	.	.	.	.	.	.	.	.	.	.	.	.	.	.	.
R_22ncrz1V5UfVbvx	1	Summary_GNG EC_April 24, 2023_08.14.xlsx	149	1	123	26	100	0	92.3077	7.69231	0.353593	0.0358987	0.3085	0.0120208	7.69231	R_3PFbCOYTc7wNnep	1	Summary_RPLT EC - T1_April 24, 2023_08.20.xlsx	T1	73	87	35	47.5	0.684857	0.800895	0.897423	0.739143	57.5	32.5	0.395391	0.458	0.441706	0.433333	-375	R_24PLPQu9PNk3DaN	1	Summary_EST EC_April 24, 2023_08.11.xlsx	72	0	0	36	36	95.8333	91.6667	95.8333	100	0.791208	0.693292	0.85825
R_3CTJIfzfGhta7l4	1	Summary_GNG EC_April 24, 2023_08.14.xlsx	150	0	123	27	99.187	0.813008	92.5926	7.40741	0.382082	0.0555577	0.323	0.0339411	7.46812	R_2Y8Pjp3tnbYxQi4	1	Summary_RPLT EC - T1_April 24, 2023_08.20.xlsx	T1	75	85	35	50	1.00114	0.9863	1.45477	1.6445	47.5	45	0.572368	0.680611	0.743905	0.621	-225	R_wNS66BLjyduWvzr	1	Summary_EST EC_April 24, 2023_08.11.xlsx	72	0	0	36	36	95.8333	91.6667	100	100	0.648458	0.561625	0.683875
R_2pWE4G4XgF05oyK	1	Summary_GNG EC_April 24, 2023_08.14.xlsx	149	1	122	27	95.9016	4.09836	74.0741	25.9259	0.356521	0.0573649	0.284286	0.0253095	27.0339	R_2zTLD2J7IBTl4KC	1	Summary_RPLT T4 EC_April 24, 2023_09.46.xlsx	T4	66	94	50	57.5	1.37345	1.39165	1.502	1.05276	62.5	40	1.08932	0.932688	0.936867	1.00858	50	R_PNlgFlE60jtjiTf	1	Summary_EST EC_April 24, 2023_08.11.xlsx	72	0	0	36	36	95.8333	91.6667	100	100	0.65925	0.584958	0.640917
R_AoOFWAbc6fKHalr	1	Summary_GNG EC_April 24, 2023_08.14.xlsx	149	1	122	27	99.1803	0.819672	88.8889	11.1111	0.34895	0.0382337	0.279667	0.0418848	11.2029	R_25BCyZk7x67MZ7p	1	Summary_RPLT EC - T1_April 24, 2023_08.20.xlsx	T1	87	73	42.5	50	0.683412	0.60765	0.592478	0.58595	47.5	37.5	0.456579	0.590733	0.548095	0.65032	-175	R_3qIJOjoB27xjpEA	1	Summary_EST EC_April 24, 2023_08.11.xlsx	69	0	3	34	35	86.9565	95.6522	82.6087	66.6667	0.511609	0.391957	0.432783
R_yVblYe4FKdPdjW1	1	Summary_GNG EC_April 24, 2023_08.14.xlsx	149	1	123	26	97.561	2.43902	80.7692	19.2308	0.335825	0.0447617	0.3238	0.0432863	19.7115	R_3NE5sEBtGA89odT	1	Summary_RPLT EC - T1_April 24, 2023_08.20.xlsx	T1	63	97	57.5	45	0.875043	0.914056	1.04841	0.897955	40	50	0.378563	0.45815	0.473792	0.3975	-75	R_10qKzM7EMoumH5p	1	Summary_EST EC_April 24, 2023_08.11.xlsx	72	0	0	36	36	91.6667	100	100	100	0.773833	0.563458	0.547583
R_3p8PJciSYSebJ5T	1	Summary_GNG EC_April 24, 2023_08.14.xlsx	150	0	123	27	96.748	3.25203	85.1852	14.8148	0.352294	0.0500036	0.29725	0.0260432	15.3128	R_1lynL6Dx3I0W4Zr	1	Summary_RPLT EC - T1_April 24, 2023_08.20.xlsx	T1	39	121	52.5	60	1.93019	1.37067	1.34968	1.74294	52.5	87.5	0.861762	1.33126	0.872158	1.8544	375	R_3j1iTzYyLvL49wr	1	Summary_EST EC_April 24, 2023_08.11.xlsx	72	0	0	36	36	100	91.6667	95.8333	100	0.52975	0.52975	0.617042
R_3felsPLdJlFZBFP	1	Summary_GNG EC_April 24, 2023_08.14.xlsx	150	0	123	27	96.748	3.25203	92.5926	7.40741	0.388487	0.0463042	0.358	0.00989949	7.6564	R_3LhRXRpqEKDnIW3	1	Summary_RPLT EC - T1_April 24, 2023_08.20.xlsx	T1	83	77	40	62.5	1.37431	1.1698	1.31058	1.36693	62.5	52.5	1.02452	1.22805	0.930867	0.980158	75	R_3rNanspoa1LNI3P	1	Summary_EST EC_April 24, 2023_08.11.xlsx	72	0	0	36	36	100	100	100	100	0.874042	0.874042	0.799417
R_2bW6x9kXMRE3v7E	1	Summary_GNG EC_April 24, 2023_08.14.xlsx	149	1	122	27	98.3607	1.63934	92.5926	7.40741	0.358567	0.037236	0.31	0.00141421	7.53086	R_RxWNm92y747hQY1	1	Summary_RPLT EC - T1_April 24, 2023_08.20.xlsx	T1	86	74	52.5	55	1.07043	0.920773	1.06521	0.838944	47.5	35	0.572053	0.700929	0.429333	0.530769	-150	R_3KPnSsqLbAGpgT9	1	Summary_EST EC_April 24, 2023_08.11.xlsx	72	0	0	36	36	100	100	95.8333	100	0.533833	0.533833	0.494625
R_1gtm1JLuiq0xfmN	1	Summary_GNG EC_April 24, 2023_08.14.xlsx	150	0	123	27	96.748	3.25203	96.2963	3.7037	0.390134	0.0360762	0.366	.	3.8282	R_1HbN9U1iT6hDpqL	1	Summary_RPLT EC - T1_April 24, 2023_08.20.xlsx	T1	109	51	50	72.5	0.99545	1.36852	1.2168	1.45064	50	95	0.8056	0.980526	1.0956	1.2465	575	R_2P8cbhTUKvS2sZu	1	Summary_EST EC_April 24, 2023_08.11.xlsx	71	0	1	35	36	100	95.8333	95.8333	100	0.524565	0.524565	0.595583
R_3O0SWqqFaPimBYA	1	Summary_GNG EC_April 24, 2023_08.14.xlsx	149	1	123	26	97.561	2.43902	88.4615	11.5385	0.357567	0.0596964	0.292	0.0363456	11.8269	R_1NekcWiuep01MVw	1	Summary_RPLT T4 EC_April 24, 2023_09.46.xlsx	T4	98	62	52.5	57.5	1.32686	1.75078	2.59063	1.65341	57.5	57.5	0.955957	1.21322	1.43959	1.19835	50	R_dcCLuDZSieroQJr	1	Summary_EST EC_April 24, 2023_08.11.xlsx	71	0	1	36	35	87.5	100	95.8333	100	0.961208	0.666083	0.695609
R_3pceje0iaYG59da	1	Summary_GNG EC_April 24, 2023_08.14.xlsx	149	1	122	27	100	0	96.2963	3.7037	0.322393	0.0368837	0.288	.	3.7037	R_WdmengUDJyNw47L	1	Summary_RPLT T4 EC_April 24, 2023_09.46.xlsx	T4	89	71	55	47.5	1.20527	1.05795	0.991389	1.15186	50	55	0.89905	0.947455	0.91395	0.916889	75	R_2uNIjL3ZFkNxkci	1	Summary_EST EC_April 24, 2023_08.11.xlsx	71	0	1	35	36	100	100	95.8333	100	0.457826	0.457826	0.468
R_1oz3quuaUT0urGt	1	Summary_GNG EC_April 24, 2023_08.14.xlsx	150	0	123	27	100	0	96.2963	3.7037	0.318813	0.0300015	0.308	.	3.7037	R_1Kg0uxe3E1PQzUr	1	Summary_RPLT T4 EC_April 24, 2023_09.46.xlsx	T4	64	96	45	47.5	0.303278	0.306368	0.321636	0.537333	62.5	60	0.41488	0.294417	0.208667	0.618062	50	R_sLLjvFc6i76xai5	1	Summary_EST EC_April 24, 2023_08.11.xlsx	72	0	0	36	36	100	95.8333	95.8333	100	0.419375	0.419375	0.494292
R_3L51LdYA3BM6eCC	1	Summary_GNG EC_April 24, 2023_08.14.xlsx	145	5	119	26	95.7983	4.20168	69.2308	30.7692	0.349228	0.0549991	0.3115	0.0550195	32.1188	R_6r2gVRQpSFUKOZ3	1	Summary_RPLT T4 EC_April 24, 2023_09.46.xlsx	T4	110	50	55	55	0.676091	0.870318	1.14689	1.17511	55	40	0.521955	0.537125	0.535278	0.902083	-100	R_XNfzyrdYzHsxHnH	1	Summary_EST EC_April 24, 2023_08.11.xlsx	72	0	0	36	36	95.8333	87.5	100	100	0.784333	0.685875	0.85275
R_1gOAsv2fNGoeg8B	1	Summary_GNG EC_April 24, 2023_08.14.xlsx	150	0	123	27	99.187	0.813008	92.5926	7.40741	0.329451	0.0433399	0.293	0.0169706	7.46812	R_1LBY7SaxPlA5lNQ	1	Summary_RPLT T4 EC_April 24, 2023_09.46.xlsx	T4	76	84	45	57.5	0.861667	1.08648	0.601	0.628471	62.5	50	0.21276	0.2492	0.222267	0.25135	0	R_z8CnPfYX4tus1Ud	1	Summary_EST EC_April 24, 2023_08.11.xlsx	72	0	0	36	36	95.8333	91.6667	95.8333	100	0.574792	0.506875	0.577667
R_2YrFri8Tw9v4GF6	1	Summary_GNG EC_April 24, 2023_08.14.xlsx	150	0	123	27	93.4959	6.50407	96.2963	3.7037	0.387583	0.059363	0.29	.	3.96135	R_dhUJOaqeKokvoGJ	1	Summary_RPLT T4 EC_April 24, 2023_09.46.xlsx	T4	78	82	45	47.5	1.06983	0.909895	0.860045	0.700667	52.5	50	0.387714	0.487	0.460632	0.46695	50	R_1CkFPdRaU0p9hql	1	Summary_EST EC_April 24, 2023_08.11.xlsx	72	0	0	36	36	91.6667	95.8333	100	100	0.626833	0.490042	0.596875
R_w1TUht9dZa0Falb	1	Summary_GNG EC_April 24, 2023_08.14.xlsx	149	1	123	26	99.187	0.813008	96.1538	3.84615	0.342426	0.0375288	0.295	.	3.87768	R_rioXLtdU9OX9JXr	1	Summary_RPLT T4 EC_April 24, 2023_09.46.xlsx	T4	86	74	52.5	52.5	1.251	1.13714	1.35879	1.11616	50	50	0.5744	0.67805	0.69565	0.7137	-50	R_1DqDkYDlqyZpHqB	1	Summary_EST EC_April 24, 2023_08.11.xlsx	72	0	0	36	36	95.8333	83.3333	95.8333	100	0.483417	0.438958	0.651417
R_2f9wCp226QCnRx8	1	Summary_GNG EC_April 24, 2023_08.14.xlsx	150	0	123	27	99.187	0.813008	88.8889	11.1111	0.338123	0.0355083	0.328667	0.0510131	11.2022	R_DxjMgbkVGRX7A4x	1	Summary_RPLT T4 EC_April 24, 2023_09.46.xlsx	T4	78	82	60	45	0.5245	0.517222	0.4945	0.522909	40	40	0.333813	0.335375	0.274958	0.26	-250	R_3kiTUS6hcm53FDO	1	EST_forwarded9May2023.xlsx	72	0	0	36	36	95.8333	100	100	100	0.493125	0.416792	0.438875
R_2UarNASFoORSfea	1	Summary_GNG EC_April 24, 2023_08.14.xlsx	150	0	123	27	86.1789	13.8211	81.4815	18.5185	0.384481	0.0466029	0.36	0.0262869	21.4885	R_Q9UF9fkEaLjAsyB	1	Summary_RPLT T4 EC_April 24, 2023_09.46.xlsx	T4	102	58	45	65	1.18461	1.11223	1.07236	1.25636	45	45	0.742944	0.777722	0.635045	0.688182	-50	R_6G03LM77mbaGf5v	1	EST_forwarded9May2023.xlsx	72	0	0	36	36	100	91.6667	100	100	0.559042	0.559042	0.59975
R_pEQb0L0n589Ks0N	1	Summary_GNG EC_November 19, 2022_10.26.xlsx	150	0	123	27	99.187	0.813008	92.5926	7.40741	0.35123	0.0376868	0.2975	0.000707107	7.46812	R_2tioyvJW6ppeLOB	1	Summary_RPLT T4 EC_November 19, 2022_10.20.xlsx	T4	83	77	50	52.5	0.71915	0.817333	0.785	0.918632	52.5	32.5	0.50319	0.656154	0.697158	0.818296	-225	R_12gJDD7Ed0tHSf1	1	Summary_EST EC_November 19, 2022_10.30.xlsx	72	0	0	36	36	79.1667	91.6667	87.5	75	0.609542	0.416792	0.489208
.	.	.	.	.	.	.	.	.	.	.	.	.	.	.	.	.	.	.	.	.	.	.	.	.	.	.	.	.	.	.	.	.	.	.	R_1lzY2VIddjcq7lR	1	EST_forwarded9May2023.xlsx	72	0	0	36	36	95.8333	95.8333	95.8333	100	0.599875	0.513792	0.5895
R_1g78DtIaoOvQtnK	1	Summary_GNG EC_incomplete.xlsx	149	1	122	27	88.5246	11.4754	96.2963	3.7037	0.387713	0.0496334	0.43	.	4.18381	.	.	.	.	.	.	.	.	.	.	.	.	.	.	.	.	.	.	.	R_2EvgqBCvVIL5BFJ	1	Summary_EST EC_incomplete.xlsx	69	0	3	33	36	95.4545	91.3043	91.6667	75	0.578955	0.504	0.498174
R_5d8cyjAQVBPochz	1	Summary_GNG EC_incomplete.xlsx	149	1	122	27	98.3607	1.63934	81.4815	18.5185	0.335308	0.0455376	0.3022	0.0375726	18.8272	.	.	.	.	.	.	.	.	.	.	.	.	.	.	.	.	.	.	.	R_3HMpw1IDkqo1CLT	1	Summary_EST EC_incomplete.xlsx	72	0	0	36	36	95.8333	91.6667	100	100	0.57225	0.506375	0.635417
R_9TrxJPFsfLnajlv	1	Summary_GNG EC_incomplete.xlsx	150	0	123	27	97.561	2.43902	88.8889	11.1111	0.345575	0.0526973	0.275667	0.0212211	11.3889	.	.	.	.	.	.	.	.	.	.	.	.	.	.	.	.	.	.	.	R_22t3TMR7MdnU3Bc	1	EST_forwarded9May2023.xlsx	72	0	0	36	36	91.6667	91.6667	91.6667	100	0.737792	0.618708	0.81375
R_sG4NF8RWzgz5aHD	1	Summary_GNG EC_November 19, 2022_10.26.xlsx	150	0	123	27	99.187	0.813008	85.1852	14.8148	0.37127	0.0405597	0.37	0.008	14.9362	R_DeE97GtziLCFEDT	1	Summary_RPLT EC - T1_November 19, 2022_10.48.xlsx	T1	83	77	45	52.5	1.222	0.925619	0.919364	0.951474	40	45	0.817937	0.884167	0.792958	0.795045	-175	R_3feLZGYi7DMQJjg	1	Summary_EST EC_November 19, 2022_10.30.xlsx	72	0	0	36	36	100	100	91.6667	100	0.541167	0.541167	0.573625
R_PSY73h5Oj4Yuglr	1	Summary_GNG EC_November 19, 2022_10.26.xlsx	150	0	123	27	99.187	0.813008	88.8889	11.1111	0.30223	0.0448494	0.252667	0.026839	11.2022	R_1d6oWg9ydh0VVsT	1	Summary_RPLT EC - T1_November 19, 2022_10.48.xlsx	T1	80	80	55	60	0.784636	0.675083	0.508056	0.495	65	65	0.227654	0.271615	0.216714	0.225857	450	R_9QVmLaNoraNk9Pj	1	Summary_EST EC_November 19, 2022_10.30.xlsx	72	0	0	36	36	95.8333	100	95.8333	100	0.493125	0.437625	0.423
.	.	.	.	.	.	.	.	.	.	.	.	.	.	.	.	.	.	.	.	.	.	.	.	.	.	.	.	.	.	.	.	.	.	.	.	.	.	.	.	.	.	.	.	.	.	.	.	.	.
R_3061AYFtCYAwOjW	1	Summary_GNG EC_incomplete.xlsx	150	0	123	27	97.561	2.43902	88.8889	11.1111	0.39445	0.036597	0.369	0.0216333	11.3889	.	.	.	.	.	.	.	.	.	.	.	.	.	.	.	.	.	.	.	R_31hernpV38rnzHC	1	EST_forwarded9May2023.xlsx	72	0	0	36	36	79.1667	87.5	87.5	75	0.926083	0.472375	0.680417
R_22wXy4R2S0JTsPQ	1	Summary_GNG EC_incomplete.xlsx	150	0	123	27	100	0	85.1852	14.8148	0.361894	0.0359692	0.32975	0.026437	14.8148	.	.	.	.	.	.	.	.	.	.	.	.	.	.	.	.	.	.	.	R_3P5ijmctmPrHKqL	1	Summary_EST EC_incomplete.xlsx	72	0	0	36	36	87.5	79.1667	95.8333	100	0.598	0.432125	0.739292
R_yOqT3ecyTqRufCN	1	Summary_GNG EC_November 19, 2022_10.26.xlsx	148	2	122	26	93.4426	6.55738	76.9231	23.0769	0.327158	0.0595573	0.271167	0.0482884	24.6964	R_qUwNaBM3ihNN6cp	1	Summary_RPLT T4 EC_November 19, 2022_10.20.xlsx	T4	49	111	47.5	42.5	0.732263	0.715706	0.59519	0.551783	47.5	65	0.673579	0.641615	0.680143	0.608857	-75	R_87wPwplv0HtQVq1	1	Summary_EST EC_November 19, 2022_10.30.xlsx	72	0	0	36	36	100	91.6667	95.8333	75	0.569667	0.569667	0.761708
.	.	.	.	.	.	.	.	.	.	.	.	.	.	.	.	R_2VeuR4gkYBhMFQ3	1	Summary_RPLT T4 EC_November 19, 2022_10.20.xlsx	T4	78	82	62.5	60	0.70008	0.725333	0.7594	0.778687	37.5	55	0.4978	0.618227	0.62012	0.762556	250	.	.	.	.	.	.	.	.	.	.	.	.	.	.	.
R_3hmB4Dw7KWbXRyw	1	Summary_GNG EC_November 19, 2022_10.26.xlsx	150	0	123	27	42.2764	57.7236	92.5926	7.40741	0.413077	0.0522107	0.3705	0.0968736	17.5214	R_27drrB2N363Opih	1	Summary_RPLT T4 EC_November 19, 2022_10.20.xlsx	T4	94	66	87.5	85	1.06829	0.977971	1.1662	1.6335	20	37.5	1.17663	1.2616	0.924438	0.9482	0	R_T6pc3ePYCKX78K5	1	Summary_EST EC_November 19, 2022_10.30.xlsx	72	0	0	36	36	100	100	100	100	0.707667	0.707667	0.791
R_zS7qydwzbtChaEN	1	Summary_GNG EC_November 19, 2022_10.26.xlsx	150	0	123	27	95.122	4.87805	85.1852	14.8148	0.327573	0.0525087	0.27725	0.025992	15.5745	R_2i8c7AEPCtnzmPn	1	Summary_RPLT T4 EC_November 19, 2022_10.20.xlsx	T4	90	70	37.5	57.5	0.772067	0.842478	0.93088	0.699529	47.5	42.5	0.691421	0.735059	0.709429	0.79413	-100	R_12mZjNjjmg4AZam	1	Summary_EST EC_November 19, 2022_10.30.xlsx	72	0	0	36	36	87.5	95.8333	83.3333	75	0.60475	0.362875	0.394875
R_2do8lQQvvX68Af9	1	Summary_GNG EC_November 19, 2022_10.26.xlsx	147	3	120	27	98.3333	1.66667	74.0741	25.9259	0.343458	0.0521534	0.298714	0.0254932	26.3653	R_3DkLnUaciRpGna9	1	Summary_RPLT T4 EC_November 19, 2022_10.20.xlsx	T4	106	54	37.5	40	0.655933	0.700812	0.63948	0.629958	52.5	45	0.281857	0.338556	0.261105	0.305227	-350	R_5Ae01GtJqsiQtNL	1	Summary_EST EC_November 19, 2022_10.30.xlsx	72	0	0	36	36	83.3333	95.8333	100	100	1.17275	0.575917	0.636458
.	.	.	.	.	.	.	.	.	.	.	.	.	.	.	.	R_300sb0b5TBoi2bm	1	Summary_RPLT T4 EC_November 19, 2022_10.20.xlsx	T4	121	39	42.5	55	0.704235	0.619136	0.669043	0.827333	50	80	0.47615	0.581781	0.51055	0.54425	225	.	.	.	.	.	.	.	.	.	.	.	.	.	.	.
R_4OTkDLPVTKU5KJb	1	Summary_GNG EC_November 19, 2022_10.26.xlsx	150	0	123	27	92.6829	7.31707	96.2963	3.7037	0.366026	0.0423768	0.315	.	3.9961	R_3KO4WpsA15WMSbH	1	Summary_RPLT T4 EC_November 19, 2022_10.20.xlsx	T4	79	81	67.5	72.5	1.08789	0.747828	0.727	0.856727	42.5	35	0.624706	1.04829	0.596435	0.714423	25	R_1OWbtBbGK34AJv7	1	Summary_EST EC_November 19, 2022_10.30.xlsx	72	0	0	36	36	95.8333	95.8333	91.6667	100	0.630167	0.571167	0.5675
R_2aOUPjrnsVtSk6o	1	Summary_GNG EC_November 19, 2022_10.26.xlsx	150	0	123	27	97.561	2.43902	96.2963	3.7037	0.333642	0.0445553	0.269	.	3.7963	R_1MTieGeJhp9lK5V	1	Summary_RPLT T4 EC_November 19, 2022_10.20.xlsx	T4	83	77	55	52.5	0.758682	0.745381	0.7445	0.874632	42.5	62.5	0.372412	0.42344	0.474217	0.4798	-75	R_3IY5MSJEWPe8Huo	1	Summary_EST EC_November 19, 2022_10.30.xlsx	72	0	0	36	36	100	100	95.8333	100	0.397125	0.397125	0.401125
R_3qEeYoKFpkkh3dO	1	Summary_GNG EC_November 19, 2022_10.26.xlsx	148	2	121	27	97.5207	2.47934	88.8889	11.1111	0.359542	0.0461507	0.327667	0.0347035	11.3936	R_xn3dmvZgMud5BFn	1	Summary_RPLT T4 EC_November 19, 2022_10.20.xlsx	T4	82	78	45	60	0.914611	0.777125	0.689455	0.547875	55	40	0.496773	0.55	0.477833	0.45425	100	R_6MewWl1dvdseugV	1	Summary_EST EC_November 19, 2022_10.30.xlsx	72	0	0	36	36	95.8333	95.8333	95.8333	100	0.543292	0.448333	0.573333
R_DTYVEqdBVWryV21	1	Summary_GNG EC_November 19, 2022_10.26.xlsx	149	1	122	27	91.8033	8.19672	88.8889	11.1111	0.384875	0.0606162	0.333333	0.0593745	12.1032	R_2B9vXlQcvbJVJha	1	Summary_RPLT T4 EC_November 19, 2022_10.20.xlsx	T4	106	54	50	60	1.27025	1.29558	1.1616	1.26081	50	35	1.2517	1.1035	1.36805	2.15546	-200	R_2CJLmtRi3buJSgv	1	Summary_EST EC_November 19, 2022_10.30.xlsx	72	0	0	36	36	100	100	100	100	0.56325	0.56325	0.600792
R_263zf4k9ysFpLCs	1	Summary_GNG EC_incomplete.xlsx	150	0	123	27	95.122	4.87805	96.2963	3.7037	0.379812	0.0477063	0.327	.	3.89364	.	.	.	.	.	.	.	.	.	.	.	.	.	.	.	.	.	.	.	.	.	.	.	.	.	.	.	.	.	.	.	.	.	.
R_2q4UtnSsjoGvfdv	1	Summary_GNG EC_November 19, 2022_10.26.xlsx	150	0	123	27	100	0	77.7778	22.2222	0.327016	0.0416394	0.3065	0.0485088	22.2222	R_DBtmjHlS3kUGY4F	1	Summary_RPLT T4 EC_November 19, 2022_10.20.xlsx	T4	113	47	70	52.5	0.430107	0.494619	0.295667	0.513316	40	75	0.332062	0.4364	0.36425	0.2189	275	R_1H69oZUSwuZk8Xv	1	Summary_EST EC_November 19, 2022_10.30.xlsx	72	0	0	36	36	100	83.3333	83.3333	100	0.414708	0.414708	0.590625
R_2QQxmBJ9WQ3zbqj	1	Summary_GNG EC_November 19, 2022_10.26.xlsx	150	0	123	27	96.748	3.25203	92.5926	7.40741	0.379017	0.0451729	0.3425	0.0120208	7.6564	R_2pYkSFT3IOcq9RX	1	Summary_RPLT T4 EC_November 19, 2022_10.20.xlsx	T4	74	86	50	45	0.87935	0.770333	0.76775	0.647227	57.5	37.5	0.436739	0.644933	0.447471	0.43892	-250	R_2zSBwerYo58jrre	1	Summary_EST EC_November 19, 2022_10.30.xlsx	72	0	0	36	36	95.8333	95.8333	95.8333	100	0.57475	0.52125	0.737333
R_2xS1OVqES1RAKTl	1	Summary_GNG EC_November 19, 2022_10.26.xlsx	150	0	123	27	100	0	88.8889	11.1111	0.305431	0.0379571	0.271	0.00953939	11.1111	R_1qWdddCN2qmUg4E	1	Summary_RPLT T4 EC_November 19, 2022_10.20.xlsx	T4	124	36	52.5	52.5	0.845	0.832143	0.991158	0.942105	50	80	0.51465	0.638	0.47715	0.635375	350	R_2vkzZ1dq5XZtQdz	1	Summary_EST EC_November 19, 2022_10.30.xlsx	72	0	0	36	36	87.5	100	100	100	0.731625	0.546375	0.502417
R_12PAyJaH9DwzDxI	1	Summary_GNG EC_November 19, 2022_10.26.xlsx	150	0	123	27	99.187	0.813008	74.0741	25.9259	0.334213	0.0723843	0.260714	0.0318576	26.1384	R_1P4MccBk5enGflo	1	Summary_RPLT EC - T1_November 19, 2022_10.48.xlsx	T1	105	55	35	72.5	0.692857	0.768069	0.884769	1.03973	75	50	0.5874	0.84425	0.7657	0.7439	225	R_2BzXcP3OR3u5UK2	1	Summary_EST EC_November 19, 2022_10.30.xlsx	72	0	0	36	36	87.5	95.8333	95.8333	100	0.648625	0.444833	0.498167
R_w6FRkYaYXtmVWwx	1	Summary_GNG EC_November 19, 2022_10.26.xlsx	149	1	122	27	100	0	88.8889	11.1111	0.289107	0.0405269	0.223	0.0127671	11.1111	R_BrmqDREyueIoBxL	1	Summary_RPLT T4 EC_November 19, 2022_10.20.xlsx	T4	39	121	50	77.5	0.8491	0.750581	0.62675	0.666667	50	75	0.49675	1.1063	0.55025	0.6382	325	R_24v1SmNRTjO9kD3	1	Summary_EST EC_November 19, 2022_10.30.xlsx	71	0	0	36	35	100	100	100	100	0.499875	0.499875	0.454522
R_2VgvxYETkPLOpvU	1	Summary_GNG EC_November 19, 2022_10.26.xlsx	150	0	123	27	99.187	0.813008	85.1852	14.8148	0.342385	0.0374752	0.306	0.0292575	14.9362	R_1LOPj2zi5DW7DEM	1	Summary_RPLT T4 EC_November 19, 2022_10.20.xlsx	T4	77	83	52.5	62.5	0.885571	0.757	0.841737	0.841667	50	52.5	0.4693	0.504667	0.37525	0.523421	-25	R_cBWHd4rzy0Qt6JH	1	Summary_EST EC_November 19, 2022_10.30.xlsx	72	0	0	36	36	100	95.8333	100	100	0.536458	0.536458	0.601667
R_1JLq1ZYNC5bYP3X	1	Summary_GNG EC_November 19, 2022_10.26.xlsx	150	0	123	27	94.3089	5.69106	85.1852	14.8148	0.350319	0.0542025	0.28875	0.00991211	15.7088	R_2Sq3D3YvNhAAJhK	1	Summary_RPLT T4 EC_November 19, 2022_10.20.xlsx	T4	90	70	40	57.5	1.04238	0.946957	1.03008	1.21376	55	32.5	0.559864	0.665923	0.563222	0.529593	-100	R_1P2fsfYwzd8qqDu	1	Summary_EST EC_November 19, 2022_10.30.xlsx	72	0	0	36	36	87.5	100	87.5	100	1.07633	0.630083	0.656708
R_28D025b3Cw7P5hF	1	Summary_GNG EC_November 19, 2022_10.26.xlsx	149	1	123	26	93.4959	6.50407	92.3077	7.69231	0.396478	0.0558187	0.3575	0.106773	8.22742	R_DIBAGCthHJlXEEp	1	Summary_RPLT T4 EC_November 19, 2022_10.20.xlsx	T4	89	71	75	70	1.07703	1.06221	0.8199	0.920917	50	62.5	0.9058	0.79968	0.87325	0.784933	375	R_ehD4vtrjuPOsMRb	1	Summary_EST EC_November 19, 2022_10.30.xlsx	72	0	0	36	36	87.5	100	91.6667	75	0.691583	0.494292	0.502208
R_28MxvBO9Ds44GHV	1	Summary_GNG EC_November 19, 2022_10.26.xlsx	150	0	123	27	100	0	48.1481	51.8519	0.29335	0.0388467	0.265357	0.0203077	51.8519	R_29psEB53f0sytHj	1	Summary_RPLT T4 EC_November 19, 2022_10.20.xlsx	T4	114	46	47.5	70	0.971053	1.01761	1.11538	1.25075	45	42.5	0.490556	0.667588	0.448545	0.623087	-150	R_1IyZQrR5ZZumiie	1	EST_forwarded9May2023.xlsx	72	0	0	36	36	95.8333	95.8333	95.8333	100	0.487375	0.407042	0.546875
R_SHOmBjkSlPTKP3r	1	Summary_GNG EC_November 19, 2022_10.26.xlsx	150	0	123	27	100	0	96.2963	3.7037	0.34687	0.0450852	0.292	.	3.7037	R_ul9Vwq29ailZeFP	1	Summary_RPLT T4 EC_November 19, 2022_10.20.xlsx	T4	86	74	50	60	1.0362	1.265	1.0312	0.756125	55	50	0.403682	0.4188	0.3325	0.4844	200	R_T1uQAGUFFPNKBot	1	EST_forwarded9May2023.xlsx	70	0	1	35	35	81.8182	79.1667	83.3333	100	1.02441	0.512091	0.962042
R_AvoCNVPDpoqssr7	1	Summary_GNG EC_November 19, 2022_10.26.xlsx	150	0	123	27	99.187	0.813008	81.4815	18.5185	0.337762	0.0372346	0.2958	0.0134796	18.6703	R_3iqfYqyQVKqGmoP	1	Summary_RPLT T4 EC_November 19, 2022_10.20.xlsx	T4	97	63	42.5	57.5	0.837529	1.07452	0.880174	0.873588	62.5	55	0.91124	1.07895	1.00293	0.895611	125	R_3P7eg53GBYlyNJu	1	EST_forwarded9May2023.xlsx	72	0	0	36	36	87.5	95.8333	100	100	0.548458	0.43075	0.480333
[truncated: 63 more columns]

## Sheet: questionnaire_scoring
id	demo1	demo2	demo3	demo4	demo5	demo6	demo7	demo8	demo9	demo10	demo11	demo12	demo13	be1	be2	be3	be4	be5	be6	be7	be8	be9	be10	be11	be12	be13	be14	be15	be16	be17	be18	be19	be20	be21	bb1	bb2	bb3	bb4	bb5	bb6	bb7	bb8	bb9	bb10	bb11	bb12	bb13	bb14	bb15
4229	.	.	.	.	.	.	.	.	.	.	.	.	.	.	.	.	.	.	.	.	.	.	.	.	.	.	.	.	.	.	.	.	.	.	.	.	.	.	.	.	.	.	.	.	.	.	.	.	.
5172	.	.	.	.	.	.	.	.	.	.	.	.	.	.	.	.	.	.	.	.	.	.	.	.	.	.	.	.	.	.	.	.	.	.	.	.	.	.	.	.	.	.	.	.	.	.	.	.	.
8273	.	.	.	.	.	.	.	.	.	.	.	.	.	.	.	.	.	.	.	.	.	.	.	.	.	.	.	.	.	.	.	.	.	.	.	.	.	.	.	.	.	.	.	.	.	.	.	.	.
9244	.	.	.	.	.	.	.	.	.	.	.	.	.	.	.	.	.	.	.	.	.	.	.	.	.	.	.	.	.	.	.	.	.	.	.	.	.	.	.	.	.	.	.	.	.	.	.	.	.
9280	.	.	.	.	.	.	.	.	.	.	.	.	.	.	.	.	.	.	.	.	.	.	.	.	.	.	.	.	.	.	.	.	.	.	.	.	.	.	.	.	.	.	.	.	.	.	.	.	.
9570	.	.	.	.	.	.	.	.	.	.	.	.	.	.	.	.	.	.	.	.	.	.	.	.	.	.	.	.	.	.	.	.	.	.	.	.	.	.	.	.	.	.	.	.	.	.	.	.	.
21389	Female	19	5	2	2	2	2	2	2	2	2	4	2	.	.	.	.	.	.	.	.	.	.	.	.	.	.	.	.	.	.	.	.	.	.	.	.	.	.	.	.	.	.	.	.	.	.	.	.
21393	Female	22	5	1	2	2	2	2	2	2	2	1	3	2	2	2	1	2	2	2	3	1	3	1	1	2	1	2	2	1	2	2	2	0	2	4	1	2	2	2	1	1	2	2	3	1	1	2	1
21395	male	18	5	2	2	2	1	2	2	3	4	3	1	.	.	.	.	.	.	.	.	.	.	.	.	.	.	.	.	.	.	.	.	.	.	.	.	.	.	.	.	.	.	.	.	.	.	.	.
21398	male	20	1	1	1	1	2	2	2	2	2	1	3	.	.	.	.	.	.	.	.	.	.	.	.	.	.	.	.	.	.	.	.	.	.	.	.	.	.	.	.	.	.	.	.	.	.	.	.
21406	female	21	5	1	2	2	2	2	2	2	3	3	3	.	.	.	.	.	.	.	.	.	.	.	.	.	.	.	.	.	.	.	.	.	.	.	.	.	.	.	.	.	.	.	.	.	.	.	.
21414	Female	20	5	2	1	1	1	2	2	3	3	2	2	.	.	.	.	.	.	.	.	.	.	.	.	.	.	.	.	.	.	.	.	.	.	.	.	.	.	.	.	.	.	.	.	.	.	.	.
21415	Genderqueer	18	5	2	2	1	1	2	2	2	3	1	3	2	2	4	2	0	0	2	2	2	2	1	4	1	4	1	3	0	2	4	2	0	3	3	4	2	2	4	3	1	4	2	2	4	1	4	2
21416	Male	18	5	2	2	2	2	2	2	4	3	4	1	.	.	.	.	.	.	.	.	.	.	.	.	.	.	.	.	.	.	.	.	.	.	.	.	.	.	.	.	.	.	.	.	.	.	.	.
21418	Male	18	5	2	2	2	2	2	2	4	4	4	1	.	.	.	.	.	.	.	.	.	.	.	.	.	.	.	.	.	.	.	.	.	.	.	.	.	.	.	.	.	.	.	.	.	.	.	.
21419	Female	18	5	2	2	2	1	2	2	2	3	3	2	.	.	.	.	.	.	.	.	.	.	.	.	.	.	.	.	.	.	.	.	.	.	.	.	.	.	.	.	.	.	.	.	.	.	.	.
21428	Female	24	3	1	1	1	2	2	2	1	1	1	4	1	1	2	1	1	0	1	3	1	2	2	1	4	2	3	2	1	3	2	4	2	2	4	2	2	2	2	1	1	2	2	1	2	1	1	2
21430	Male	20	5	2	2	2	2	2	2	3	3	2	2	.	.	.	.	.	.	.	.	.	.	.	.	.	.	.	.	.	.	.	.	.	.	.	.	.	.	.	.	.	.	.	.	.	.	.	.
21431	Female	18	5	2	2	2	2	2	2	3	3	3	1	.	.	.	.	.	.	.	.	.	.	.	.	.	.	.	.	.	.	.	.	.	.	.	.	.	.	.	.	.	.	.	.	.	.	.	.
21432	Male	19	5	2	1	2	1	1	2	3	3	2	3	.	.	.	.	.	.	.	.	.	.	.	.	.	.	.	.	.	.	.	.	.	.	.	.	.	.	.	.	.	.	.	.	.	.	.	.
21433	.	.	.	.	.	.	.	.	.	.	.	.	.	.	.	.	.	.	.	.	.	.	.	.	.	.	.	.	.	.	.	.	.	.	.	.	.	.	.	.	.	.	.	.	.	.	.	.	.
21437	female	18	3,5	2	2	2	1	2	2	2	3	3	4	.	.	.	.	.	.	.	.	.	.	.	.	.	.	.	.	.	.	.	.	.	.	.	.	.	.	.	.	.	.	.	.	.	.	.	.
21438	female	18	5	2	2	2	2	2	2	2	3	3	3	.	.	.	.	.	.	.	.	.	.	.	.	.	.	.	.	.	.	.	.	.	.	.	.	.	.	.	.	.	.	.	.	.	.	.	.
21439	non-binary	20	5	2	1	1	2	2	1	2	2	1	1	.	.	.	.	.	.	.	.	.	.	.	.	.	.	.	.	.	.	.	.	.	.	.	.	.	.	.	.	.	.	.	.	.	.	.	.
21442	Female	18	5	1	2	2	2	2	2	4	4	4	1	.	.	.	.	.	.	.	.	.	.	.	.	.	.	.	.	.	.	.	.	.	.	.	.	.	.	.	.	.	.	.	.	.	.	.	.
21443	female	18	5	1	2	2	2	2	2	3	4	4	2	0	0	0	0	1	0	1	1	0	0	0	0	1	0	0	0	0	1	1	2	0	2	3	2	1	2	2	1	3	2	2	3	1	4	1	2
21444	male	18	5	2	2	2	2	2	2	3	2	3	1	0	0	0	0	0	0	0	0	0	0	0	0	1	0	0	0	0	0	0	1	0	2	2	2	2	2	3	2	2	2	2	3	2	2	2	2
21446	Male	20	5	2	2	2	1	2	1	2	3	3	2	.	.	.	.	.	.	.	.	.	.	.	.	.	.	.	.	.	.	.	.	.	.	.	.	.	.	.	.	.	.	.	.	.	.	.	.
21447	male	19	5	2	2	2	2	2	1	2	3	4	1	.	.	.	.	.	.	.	.	.	.	.	.	.	.	.	.	.	.	.	.	.	.	.	.	.	.	.	.	.	.	.	.	.	.	.	.
21448	female	18	5	2	2	2	2	2	2	4	4	4	1	.	.	.	.	.	.	.	.	.	.	.	.	.	.	.	.	.	.	.	.	.	.	.	.	.	.	.	.	.	.	.	.	.	.	.	.
21449	Female	20	5	2	2	2	2	2	2	2	2	2	1	.	.	.	.	.	.	.	.	.	.	.	.	.	.	.	.	.	.	.	.	.	.	.	.	.	.	.	.	.	.	.	.	.	.	.	.
21450	female	20	5	2	1	2	1	2	2	1	1	2	1	.	.	.	.	.	.	.	.	.	.	.	.	.	.	.	.	.	.	.	.	.	.	.	.	.	.	.	.	.	.	.	.	.	.	.	.
21452	Male	19	5	2	2	2	1	2	1	2	3	2	3	.	.	.	.	.	.	.	.	.	.	.	.	.	.	.	.	.	.	.	.	.	.	.	.	.	.	.	.	.	.	.	.	.	.	.	.
21459	Male	18	5	2	2	2	1	1	2	4	4	4	1	.	.	.	.	.	.	.	.	.	.	.	.	.	.	.	.	.	.	.	.	.	.	.	.	.	.	.	.	.	.	.	.	.	.	.	.
21461	non-binary	18	5	2	1	1	1	2	2	4	4	4	1	1	0	0	0	0	0	0	0	0	0	0	0	1	0	1	1	0	1	1	1	0	2	3	3	2	2	1	1	2	3	2	3	1	1	1	1
21462	female	19	1,5	1	2	2	1	2	2	2	3	3	1	.	.	.	.	.	.	.	.	.	.	.	.	.	.	.	.	.	.	.	.	.	.	.	.	.	.	.	.	.	.	.	.	.	.	.	.
21463	female	21	5	2	1	2	1	2	1	1	1	1	4	.	.	.	.	.	.	.	.	.	.	.	.	.	.	.	.	.	.	.	.	.	.	.	.	.	.	.	.	.	.	.	.	.	.	.	.
21464	female	19	5	2	1	1	2	2	2	1	3	2	3	.	.	.	.	.	.	.	.	.	.	.	.	.	.	.	.	.	.	.	.	.	.	.	.	.	.	.	.	.	.	.	.	.	.	.	.
21466	Male	18	5	2	2	2	1	2	2	2	1	1	3	.	.	.	.	.	.	.	.	.	.	.	.	.	.	.	.	.	.	.	.	.	.	.	.	.	.	.	.	.	.	.	.	.	.	.	.
21467	Female	18	2,5	2	2	2	2	2	2	3	3	3	2	1	1	0	1	1	0	1	1	0	0	0	1	2	0	1	1	0	3	1	2	1	3	3	2	1	2	2	2	2	2	3	2	2	2	2	3
21468	Male	19	5	1	2	2	2	2	2	1	2	1	4	1	1	1	2	0	0	3	0	0	3	1	1	1	0	0	2	1	2	0	2	0	2	2	3	1	1	4	2	3	3	1	1	3	1	3	2
21470	Female	18	5	2	1	1	1	1	2	1	2	1	4	.	.	.	.	.	.	.	.	.	.	.	.	.	.	.	.	.	.	.	.	.	.	.	.	.	.	.	.	.	.	.	.	.	.	.	.
21471	Female	18	2,4	2	2	2	2	2	2	3	3	3	2	.	.	.	.	.	.	.	.	.	.	.	.	.	.	.	.	.	.	.	.	.	.	.	.	.	.	.	.	.	.	.	.	.	.	.	.
21472	female	18	5	2	2	2	2	2	2	2	2	3	3	.	.	.	.	.	.	.	.	.	.	.	.	.	.	.	.	.	.	.	.	.	.	.	.	.	.	.	.	.	.	.	.	.	.	.	.
21475	Woman	18	5	2	1	1	1	2	2	3	2	1	3	1	0	1	0	1	0	0	0	0	1	3	0	4	0	1	1	0	3	0	2	1	1	4	2	1	2	1	1	2	3	3	2	4	2	2	4
21476	male	18	5	2	1	1	1	2	1	2	4	2	3	.	.	.	.	.	.	.	.	.	.	.	.	.	.	.	.	.	.	.	.	.	.	.	.	.	.	.	.	.	.	.	.	.	.	.	.
21477	Female	19	5	2	2	2	2	2	2	2	2	4	1	1	0	1	1	1	0	0	0	0	3	1	1	1	1	1	1	1	1	1	2	0	3	4	2	1	2	2	1	1	2	2	2	3	1	2	4
21478	female	34	5	2	2	1	2	2	2	2	3	2	2	0	0	0	0	1	1	1	1	0	0	1	0	2	0	1	1	1	2	0	2	2	1	4	1	1	2	3	1	2	1	3	2	1	1	1	2
21479	female	19	5	2	1	1	2	2	2	3	4	2	2	1	0	0	0	0	0	0	0	0	1	1	0	1	0	1	0	0	1	0	2	0	1	4	3	2	3	3	1	2	3	3	4	2	1	2	4
21480	Female	20	5	1	1	2	2	2	2	2	2	2	2	1	1	0	0	0	0	0	1	0	1	0	1	4	0	1	0	0	1	4	2	0	.	.	.	.	.	.	.	.	.	.	.	.	.	.	.
21483	Female	20	3,5	2	2	2	2	2	2	2	2	2	1	.	.	.	.	.	.	.	.	.	.	.	.	.	.	.	.	.	.	.	.	.	.	.	.	.	.	.	.	.	.	.	.	.	.	.	.
21484	male	20	5	2	1	1	1	1	1	3	2	2	4	3	3	4	4	1	2	3	3	4	3	3	4	1	0	3	2	3	1	2	4	1	2	1	3	3	4	3	4	2	1	1	1	2	4	2	1
21485	female	20	5	2	2	2	1	2	2	2	2	2	1	0	1	1	0	1	0	1	1	0	1	0	0	4	0	0	1	0	0	1	1	0	1	2	3	2	2	1	1	2	3	2	3	3	2	3	3
21488	Female	23	5	2	1	2	2	2	1	1	2	2	3	1	0	0	2	0	0	2	0	0	0	0	1	1	0	1	1	0	1	0	3	0	1	2	2	1	1	2	2	2	3	3	1	3	2	2	3
21492	female	21	5	2	2	2	2	2	2	2	3	2	3	1	0	0	1	0	0	0	0	0	0	0	0	2	0	1	2	0	1	1	2	1	2	3	2	1	1	2	1	1	1	2	3	2	2	2	2
21495	female	20	5	1	2	2	2	2	2	2	3	4	2	1	1	0	1	1	0	0	1	0	2	2	2	3	0	2	2	1	0	1	3	0	1	4	2	1	3	1	1	2	4	3	1	4	1	2	2
21496	Female	19	5	2	1	1	2	2	2	2	2	2	2	0	0	0	0	1	0	1	0	0	0	0	0	2	0	1	0	0	1	1	2	0	1	3	2	1	1	1	1	1	2	2	3	2	1	1	1
21501	female	18	2,5	2	1	1	1	2	2	3	4	3	2	.	.	.	.	.	.	.	.	.	.	.	.	.	.	.	.	.	.	.	.	.	.	.	.	.	.	.	.	.	.	.	.	.	.	.	.
21503	Female	18	5	1	2	2	2	2	2	4	3	4	2	.	.	.	.	.	.	.	.	.	.	.	.	.	.	.	.	.	.	.	.	.	.	.	.	.	.	.	.	.	.	.	.	.	.	.	.
21504	male	18	5	2	2	2	1	2	1	2	2	3	3	0	1	1	0	1	0	1	1	0	0	1	0	1	0	0	1	0	0	1	1	1	2	2	2	1	1	3	1	2	2	1	2	2	1	1	2
21506	male	19	5	1	2	2	1	2	2	2	4	2	1	.	.	.	.	.	.	.	.	.	.	.	.	.	.	.	.	.	.	.	.	.	.	.	.	.	.	.	.	.	.	.	.	.	.	.	.
21509	female	18	5	1	2	2	1	2	2	3	3	3	2	.	.	.	.	.	.	.	.	.	.	.	.	.	.	.	.	.	.	.	.	.	.	.	.	.	.	.	.	.	.	.	.	.	.	.	.
21510	Male	20	5	1	2	2	1	1	1	2	2	1	3	.	.	.	.	.	.	.	.	.	.	.	.	.	.	.	.	.	.	.	.	.	.	.	.	.	.	.	.	.	.	.	.	.	.	.	.
21512	female	18	5	2	1	2	2	2	2	2	4	3	4	.	.	.	.	.	.	.	.	.	.	.	.	.	.	.	.	.	.	.	.	.	.	.	.	.	.	.	.	.	.	.	.	.	.	.	.
21513	Male	18	5	1	2	2	1	2	2	3	3	3	2	.	.	.	.	.	.	.	.	.	.	.	.	.	.	.	.	.	.	.	.	.	.	.	.	.	.	.	.	.	.	.	.	.	.	.	.
21514	female	18	5	1	2	2	2	2	2	3	3	2	3	1	1	1	0	1	0	1	2	1	2	0	0	2	1	2	1	1	1	2	4	0	1	3	2	2	2	3	2	2	2	2	3	2	1	1	2
21516	Female	18	5	2	2	2	2	2	2	2	2	2	1	.	.	.	.	.	.	.	.	.	.	.	.	.	.	.	.	.	.	.	.	.	.	.	.	.	.	.	.	.	.	.	.	.	.	.	.
21517	male	18	3,5	2	2	2	1	2	2	1	1	1	3	.	.	.	.	.	.	.	.	.	.	.	.	.	.	.	.	.	.	.	.	.	.	.	.	.	.	.	.	.	.	.	.	.	.	.	.
21520	female	18	1	1	2	2	2	2	2	2	4	3	2	.	.	.	.	.	.	.	.	.	.	.	.	.	.	.	.	.	.	.	.	.	.	.	.	.	.	.	.	.	.	.	.	.	.	.	.
21531	Male	18	5	1	2	2	2	2	2	2	2	3	3	.	.	.	.	.	.	.	.	.	.	.	.	.	.	.	.	.	.	.	.	.	.	.	.	.	.	.	.	.	.	.	.	.	.	.	.
21532	Female	18	5	1	2	2	2	2	2	2	2	1	2	.	.	.	.	.	.	.	.	.	.	.	.	.	.	.	.	.	.	.	.	.	.	.	.	.	.	.	.	.	.	.	.	.	.	.	.
21533	female	18	3,5	2	2	2	2	2	1	2	1	2	3	.	.	.	.	.	.	.	.	.	.	.	.	.	.	.	.	.	.	.	.	.	.	.	.	.	.	.	.	.	.	.	.	.	.	.	.
21534	male	18	5	2	1	2	2	2	2	2	3	3	1	.	.	.	.	.	.	.	.	.	.	.	.	.	.	.	.	.	.	.	.	.	.	.	.	.	.	.	.	.	.	.	.	.	.	.	.
21536	Female	19	5	1	2	2	2	2	2	1	1	1	2	.	.	.	.	.	.	.	.	.	.	.	.	.	.	.	.	.	.	.	.	.	.	.	.	.	.	.	.	.	.	.	.	.	.	.	.
21539	Female	19	5	1	2	2	2	2	2	2	2	2	1	.	.	.	.	.	.	.	.	.	.	.	.	.	.	.	.	.	.	.	.	.	.	.	.	.	.	.	.	.	.	.	.	.	.	.	.
21540	Female	18	5	2	1	2	1	2	2	3	4	4	3	.	.	.	.	.	.	.	.	.	.	.	.	.	.	.	.	.	.	.	.	.	.	.	.	.	.	.	.	.	.	.	.	.	.	.	.
21544	male	21	5	2	2	2	1	2	1	3	3	2	2	.	.	.	.	.	.	.	.	.	.	.	.	.	.	.	.	.	.	.	.	.	.	.	.	.	.	.	.	.	.	.	.	.	.	.	.
21547	Female	18	5	1	2	2	2	2	2	3	3	3	1	.	.	.	.	.	.	.	.	.	.	.	.	.	.	.	.	.	.	.	.	.	.	.	.	.	.	.	.	.	.	.	.	.	.	.	.
21549	female	18	5	2	2	2	2	2	2	3	3	3	3	.	.	.	.	.	.	.	.	.	.	.	.	.	.	.	.	.	.	.	.	.	.	.	.	.	.	.	.	.	.	.	.	.	.	.	.
21550	Female	19	5	2	2	2	1	2	2	4	4	4	2	.	.	.	.	.	.	.	.	.	.	.	.	.	.	.	.	.	.	.	.	.	.	.	.	.	.	.	.	.	.	.	.	.	.	.	.
21551	Female	18	2	2	1	2	2	2	2	2	2	3	2	.	.	.	.	.	.	.	.	.	.	.	.	.	.	.	.	.	.	.	.	.	.	.	.	.	.	.	.	.	.	.	.	.	.	.	.
21554	female	18	5	2	2	2	2	2	2	2	2	3	1	.	.	.	.	.	.	.	.	.	.	.	.	.	.	.	.	.	.	.	.	.	.	.	.	.	.	.	.	.	.	.	.	.	.	.	.
21555	Male	18	5	1	2	2	2	2	2	2	3	3	1	.	.	.	.	.	.	.	.	.	.	.	.	.	.	.	.	.	.	.	.	.	.	.	.	.	.	.	.	.	.	.	.	.	.	.	.
21556	Male	21	5	2	2	2	1	2	2	4	4	4	4	.	.	.	.	.	.	.	.	.	.	.	.	.	.	.	.	.	.	.	.	.	.	.	.	.	.	.	.	.	.	.	.	.	.	.	.
21557	Male	21	3	2	2	2	2	2	2	3	3	4	2	.	.	.	.	.	.	.	.	.	.	.	.	.	.	.	.	.	.	.	.	.	.	.	.	.	.	.	.	.	.	.	.	.	.	.	.
21559	heterosexual	18	1	1	2	2	2	2	2	1	2	2	3	.	.	.	.	.	.	.	.	.	.	.	.	.	.	.	.	.	.	.	.	.	.	.	.	.	.	.	.	.	.	.	.	.	.	.	.
21560	Man	20	5	2	2	2	1	2	2	2	3	1	4	.	.	.	.	.	.	.	.	.	.	.	.	.	.	.	.	.	.	.	.	.	.	.	.	.	.	.	.	.	.	.	.	.	.	.	.
21563	Male	18	5	2	2	2	2	2	2	3	3	3	1	.	.	.	.	.	.	.	.	.	.	.	.	.	.	.	.	.	.	.	.	.	.	.	.	.	.	.	.	.	.	.	.	.	.	.	.
21564	female	18	5	2	1	1	2	2	2	3	3	2	2	.	.	.	.	.	.	.	.	.	.	.	.	.	.	.	.	.	.	.	.	.	.	.	.	.	.	.	.	.	.	.	.	.	.	.	.
21565	Female	18	5	2	2	2	2	2	2	4	4	3	1	.	.	.	.	.	.	.	.	.	.	.	.	.	.	.	.	.	.	.	.	.	.	.	.	.	.	.	.	.	.	.	.	.	.	.	.
21566	Female	18	5	2	2	2	2	2	1	3	2	2	2	.	.	.	.	.	.	.	.	.	.	.	.	.	.	.	.	.	.	.	.	.	.	.	.	.	.	.	.	.	.	.	.	.	.	.	.
21568	female	19	5	2	1	1	1	2	2	2	3	3	1	.	.	.	.	.	.	.	.	.	.	.	.	.	.	.	.	.	.	.	.	.	.	.	.	.	.	.	.	.	.	.	.	.	.	.	.
21570	female	18	5	2	1	1	2	1	1	4	2	2	1	.	.	.	.	.	.	.	.	.	.	.	.	.	.	.	.	.	.	.	.	.	.	.	.	.	.	.	.	.	.	.	.	.	.	.	.
21571	Female	18	5	2	2	2	2	2	2	3	2	2	3	.	.	.	.	.	.	.	.	.	.	.	.	.	.	.	.	.	.	.	.	.	.	.	.	.	.	.	.	.	.	.	.	.	.	.	.
21572	female	18	5	2	1	2	2	2	2	2	2	2	3	.	.	.	.	.	.	.	.	.	.	.	.	.	.	.	.	.	.	.	.	.	.	.	.	.	.	.	.	.	.	.	.	.	.	.	.
21574	Male	19	5	2	1	2	2	2	1	3	2	3	1	.	.	.	.	.	.	.	.	.	.	.	.	.	.	.	.	.	.	.	.	.	.	.	.	.	.	.	.	.	.	.	.	.	.	.	.
21577	Female	18	5	2	2	1	1	2	2	1	2	3	1	.	.	.	.	.	.	.	.	.	.	.	.	.	.	.	.	.	.	.	.	.	.	.	.	.	.	.	.	.	.	.	.	.	.	.	.
21578	Female	18	1,5	1	2	2	2	2	2	2	3	3	3	.	.	.	.	.	.	.	.	.	.	.	.	.	.	.	.	.	.	.	.	.	.	.	.	.	.	.	.	.	.	.	.	.	.	.	.
21579	Male	24	5	2	2	2	2	2	1	3	3	3	2	.	.	.	.	.	.	.	.	.	.	.	.	.	.	.	.	.	.	.	.	.	.	.	.	.	.	.	.	.	.	.	.	.	.	.	.
21583	Male	19	5	2	2	2	1	2	2	3	3	3	1	.	.	.	.	.	.	.	.	.	.	.	.	.	.	.	.	.	.	.	.	.	.	.	.	.	.	.	.	.	.	.	.	.	.	.	.
21592	female	19	5	2	2	2	1	2	2	2	2	1	3	.	.	.	.	.	.	.	.	.	.	.	.	.	.	.	.	.	.	.	.	.	.	.	.	.	.	.	.	.	.	.	.	.	.	.	.
.	.	.	.	.	.	.	.	.	.	.	.	.	.	.	.	.	.	.	.	.	.	.	.	.	.	.	.	.	.	.	.	.	.	.	.	.	.	.	.	.	.	.	.	.	.	.	.	.	.
.	.	.	.	.	.	.	.	.	.	.	.	.	.	.	.	.	.	.	.	.	.	.	.	.	.	.	.	.	.	.	.	.	.	.	.	.	.	.	.	.	.	.	.	.	.	.	.	.	.
0012SP23	male	19	1	1	2	2	2	2	2	2	3	3	2	0	0	0	0	0	0	0	0	0	0	0	0	1	0	0	0	0	0	0	1	0	1	2	1	2	1	3	1	4	1	1	3	1	4	2	2
001SP23	MALE	38	1	1	2	2	2	2	2	2	2	2	3	0	1	0	1	0	0	0	1	0	0	1	1	1	0	1	1	0	1	0	2	0	1	2	2	1	1	2	1	4	2	2	3	2	2	3	3
002SP23	Female	22	5	2	1	1	2	2	1	2	2	2	3	1	1	0	1	1	0	1	0	0	1	0	1	1	1	1	1	0	1	1	2	0	1	3	3	2	2	2	2	2	3	2	3	2	1	2	2
003SP23	female	24	5	2	1	1	2	2	2	2	2	3	2	2	0	2	1	3	2	1	3	1	2	1	1	3	2	2	3	2	2	2	3	1	1	4	2	2	1	3	1	2	1	2	1	1	1	1	1
004SP23	trans-man	19	5	2	2	2	2	2	2	2	2	1	2	1	0	0	1	1	1	0	0	1	1	1	1	1	0	0	1	1	1	1	2	0	3	3	2	1	2	2	2	2	1	3	3	1	2	2	3
005SP23	Female	20	5	2	2	2	2	2	2	3	3	2	1	0	0	0	1	0	0	0	1	0	1	0	0	1	0	0	1	0	0	0	1	0	2	3	4	1	1	2	2	1	2	3	2	2	2	1	4
006SP23	Male	21	3	2	2	2	2	1	2	1	1	1	3	0	1	2	0	2	0	2	2	0	0	0	0	1	2	0	1	0	1	2	1	0	3	4	2	1	1	3	2	3	2	2	1	2	1	2	2
007SP23	Female	21	5	2	2	2	1	2	2	3	3	3	2	1	0	0	1	0	0	0	0	0	3	1	0	2	0	1	0	1	1	2	2	0	1	4	2	1	1	2	1	1	1	2	2	2	2	1	2
008SP23	Female	21	5	2	1	1	1	2	2	1	1	1	3	2	1	2	1	2	2	3	2	1	0	1	2	3	2	2	3	2	3	2	4	2	4	4	2	2	2	2	1	1	2	2	1	2	1	1	2
009SP23	Female	37	5	2	1	1	1	2	2	2	2	1	2	0	2	2	0	1	2	2	2	1	1	1	1	1	2	2	3	1	3	2	3	1	3	4	3	1	2	2	2	1	2	3	3	3	1	2	2
010SP23	Female	23	5	2	1	1	1	2	1	2	3	3	2	1	0	0	2	0	0	0	0	0	0	0	1	4	0	1	2	0	1	2	3	1	3	4	2	2	2	2	1	2	2	3	4	2	1	1	2
011SP23	Female	18	5	2	2	2	1	2	1	3	3	3	4	0	1	1	0	1	0	1	1	0	0	2	1	2	1	1	2	1	1	2	2	0	1	1	4	1	2	3	1	3	2	2	3	2	3	3	1
013SP23	female	19	1	1	2	2	2	2	2	2	2	3	2	1	1	1	0	3	0	2	0	0	1	0	2	4	1	1	1	1	0	2	3	0	2	3	2	1	3	2	1	2	2	3	1	1	1	1	3
014SP23	female	20	3	2	2	2	2	2	2	2	1	2	2	0	1	1	1	0	1	1	1	0	0	0	1	2	0	0	1	2	2	2	1	0	1	3	2	2	2	2	1	3	2	3	4	1	2	2	3
015SP23	Male	19	3	2	2	2	2	2	2	4	4	4	3	0	0	0	0	2	0	0	2		0	0	0	1	0	0	1	0	0	0	3	2	1	2	1	1	1	2	2	1	1	1	1	1	1	1	1
016SP23	Female	20	5	2	1	1	1	2	1	1	1	1	3	0	1	1	1	1	0	0	1	0	2	3	1	2	0	3	2	0	0	4	4	0	2	2	1	3	1	1	1	1	1	2	3	3	2	1	1
017SP23	Female	20	5	1	2	2	2	2	2	1	1	2	3	1	0	1	1	0	0	1	1	0	0	0	1	1	0	1	2	2	2	1	1	1	1	4	2	1	2	2	1	1	2	2	4	2	1	1	3
018SP23	male	19	5	2	2	2	1	1	2	1	2	2	2	1	0	2	2	1	2	2	1	1	1	1	1	2	0	0	0	1	1	2	1	0	1	3	2	1	1	1	1	3	1	2	3	2	2	1	1
019SP23	male	20	5	1	2	2	1	2	1	2	3	2	2	0	0	2	0	1	1	2	1	0	0	0	0	2	1	1	1	1	1	1	2	0	1	3	2	2	1	1	1	2	3	3	3	3	2	1	2
020SP23	Male	19	5	2	1	2	2	2	2	2	3	2	2	0	0	1	1	0	0	1	1	0	0	0	0	2	0	1	2	1	1	1	2	0	2	3	2	1	1	2	2	3	3	2	3	3	2	4	3
021SP23	girl	20	5	1	2	2	1	2	2	3	3	3	3	1	1	2	1	1	0	2	2	1	0	1	1	1	1	1	1	0	1	2	2	0	2	3	3	2	4	2	1	2	2	4	1	2	2	2	2
id9999	Male	22	5	1	2	2	1	2	2	2	2	3	4	1	0	0	1	1	0	0	2	0	0	2	0	3	0	2	3	0	1	1	2	1	2	2	3	1	1	3	1	4	2	1	2	2	2	2	1
id3943	Female	21	5	2	2	2	1	2	2	1	1	1	3	1	2	2	4	2	2	2	2	1	3	3	4	3	2	2	2	3	2	4	4	1	1	4	2	2	3	1	2	1	3	4	1	4	1	2	2
id0073	Female	21	5	1	2	2	2	2	2	2	2	1	2	1	1	1	0	1	1	2	1	1	0	1	0	1	1	1	1	1	1	0	2	0	1	4	3	2	3	2	1	1	3	3	3	2	1	2	4
id6541	female	20	5	2	2	2	1	2	1	2	2	3	2	0	1	1	0	1	0	1	1	0	1	0	1	1	0	1	3	1	1	1	2	2	1	3	2	1	2	1	1	1	2	3	4	2	1	2	3
id8892	Female	20	5	2	1	1	2	2	1	1	2	1	3	1	2	2	2	3	2	3	3	0	2	1	2	2	1	2	0	2	3	2	3	0	3	4	2	2	3	2	1	1	3	4	2	3	1	1	4
id7521	Female	20	5	2	1	1	1	2	2	2	2	1	3	2	0	2	2	3	0	1	3	1	3	1	2	4	2	2	1	2	1	2	4	0	3	4	3	2	2	2	1	1	3	3	1	3	1	3	1
id6505	Female	21	5	2	1	1	2	2	1	2	2	3	1	0	1	0	1	0	0	0	0	0	1	0	1	2	0	2	2	0	0	1	2	1	3	1	3	2	3	2	1	1	3	1	1	2	2	3	2
id0036	female	21	1	1	2	2	1	2	2	1	2	2	2	0	0	0	1	2	0	1	2	0	1	1	1	2	0	2	1	1	2	0	2	2	2	4	2	1	2	2	1	3	1	3	2	2	2	2	4
id9286	Male	21	5	2	1	2	1	2	1	2	2	2	1	0	0	0	0	0	0	0	0	0	0	0	0	1	0	1	1	0	0	0	2	0	2	3	2	1	1	2	1	2	1	2	2	1	2	1	2
id6923	Male	25	5	2	2	2	1	2	1	2	3	3	2	0	1	0	1	2	1	1	0	1	0	1	2	1	1	2	1	1	1	1	3	0	3	4	1	1	1	2	1	1	1	1	2	3	1	1	3
id4472	Female	19	5	2	1	1	2	2	2	2	2	1	3	1	3	2	2	1	1	3	2	1	3	1	2	4	4	2	3	2	1	4	3	2	2	4	2	3	3	3	2	1	3	2	2	2	1	2	2
id7739	.	.	.	.	.	.	.	.	.	.	.	.	.	.	.	.	.	.	.	.	.	.	.	.	.	.	.	.	.	.	.	.	.	.	.	.	.	.	.	.	.	.	.	.	.	.	.	.	.
id7207	Female	32	5	1	2	2	1	2	2	2	3	3	3	0	0	0	0	0	0	1	1	0	1	1	0	1	0	1	1	0	1	0	2	0	2	2	1	1	1	1	1	2	1	2	2	1	2	1	2
id5458	female	20	5	1	1	1	2	2	2	1	2	1	4	1	1	1	2	2	1	1	1	0	2	1	1	3	1	3	3	1	2	4	4	0	2	3	1	1	1	4	2	2	2	1	3	1	3	2	2
id3612	Female	40	5	2	1	1	2	2	2	3	3	4	3	0	0	0	1	1	0	0	0	0	0	1	1	2	0	1	1	2	2	0	2	1	1	4	2	1	2	2	1	1	2	3	2	2	1	2	4
id8446	.	.	.	.	.	.	.	.	.	.	.	.	.	.	.	.	.	.	.	.	.	.	.	.	.	.	.	.	.	.	.	.	.	.	.	.	.	.	.	.	.	.	.	.	.	.	.	.	.
id6649	Female	42	5	2	1	2	2	2	1	3	2	1	4	0	0	1	1	2	0	1	2	0	0	1	0	2	1	1	0	0	0	1	1	0	3	4	3	2	2	2	2	1	3	2	2	3	2	2	3
id9660	Female	29	3,5	2	1	1	1	1	2	1	1	1	4	1	1	2	4	3	2	1	2	0	0	2	2	3	1	2	2	3	2	2	4	0	1	4	2	2	2	3	2	1	2	3	1	2	1	2	3
id6984	Female	21	5	2	2	2	1	2	2	3	3	3	1	0	0	0	0	0	0	0	0	0	0	0	0	1	0	1	0	0	0	0	1	0	2	3	2	1	2	3	1	2	2	2	2	1	2	1	1
id801918138	female	51	3,5	2	1	2	1	2	2	2	3	3	2	1	0	1	0	1	0	0	0	0	0	0	0	1	0	1	1	0	0	1	2	1	1	2	2	1	2	2	1	2	2	2	4	2	3	2	2
id5394	Female	45	5	2	1	2	1	2	2	2	2	2	3	0	1	1	1	1	0	1	2	0	0	3	1	2	0	1	3	2	1	2	3	3	2	2	2	2	2	4	2	1	1	2	1	3	2	2	4
id8303	female	21	5	1	2	2	2	2	2	3	3	3	1	0	1	1	0	0	0	1	1	0	0	0	0	1	0	1	0	0	0	0	1	0	1	3	2	1	1	1	1	1	2	2	3	2	2	1	2
id5579	Female	20	5	1	2	2	2	2	2	2	2	2	2	1	0	1	2	1	0	2	2	0	1	2	1	3	1	1	0	0	1	2	2	0	1	4	2	2	1	3	1	1	2	1	3	2	1	2	2
id2812	Female	20	5	2	1	2	1	2	2	3	3	3	1	0	0	0	0	0	0	0	0	0	0	0	0	1	0	1	1	0	0	2	2	0	2	3	1	1	1	1	1	1	1	2	3	1	1	1	1
id3924	Female	36	5	2	1	1	2	2	2	2	2	2	1	0	0	0	1	0	0	1	0	0	0	2	1	4	1	2	1	2	1	2	3	2	1	4	3	1	2	1	1	1	2	2	3	3	1	2	2
id8273	Female	28	5	2	1	2	2	2	2	2	4	4	1	0	0	0	0	0	0	0	0	0	0	0	0	1	0	0	0	0	0	0	1	0	4	4	2	1	1	1	1	1	2	1	2	2	1	1	3
id8072	Female	29	5	2	2	2	2	2	2	2	3	4	2	1	1	0	1	1	0	0	2	0	0	0	1	1	0	1	0	1	1	1	2	0	1	4	3	1	2	3	2	1	2	3	2	3	1	3	4
id6436	Female	28	5	1	1	1	2	2	2	2	3	2	3	1	0	2	1	1	1	1	2	0	0	1	1	3	2	2	1	0	1	2	3	0	2	4	2	2	1	3	2	1	1	2	2	3	1	3	2
id1933	female	21	5	2	2	2	2	2	1	2	2	2	3	1	1	1	0	0	0	1	0	0	0	1	1	2	0	0	1	1	0	0	2	0	1	4	2	1	2	1	1	1	2	2	1	2	1	1	2
id2385	Female	42	5	2	1	1	2	2	2	4	4	4	1	1	0	0	1	1	0	1	2	0	1	0	1	2	0	1	0	1	1	0	2	1	1	4	2	1	2	2	1	1	2	3	3	2	1	2	4
id6766	Female	30	5	2	1	1	1	2	2	2	1	1	3	1	1	0	1	0	0	2	0	1	2	0	4	1	0	2	1	1	1	2	1	1	1	4	3	2	1	2	1	2	3	2	3	3	1	2	2
id4229	Female	22	5	2	1	1	1	2	2	2	3	2	4	1	1	1	0	2	1	3	2	0	3	1	2	2	1	2	2	2	2	1	2	3	2	4	4	1	1	4	1	3	2	1	1	3	1	1	2
[truncated: 175 more columns]

## Sheet: MCQ_scoring
SubjID	4229	5172	8273	9244	9280	9570	21389	21393	21395	21398	21406	21414	21415	21416	21418	21419	21428	21430	21431	21432	21433	21437	21438	21439	21442	21443	21444	21446	21447	21448	21449	21450	21452	21459	21461	21462	21463	21464	21466	21467	21468	21470	21471	21472	21475	21476	21477	21478	21479
mc1	.	.	.	.	.	.	1	1	1	1	1	1	1	2	1	2	1	1	2	1	.	1	1	1	1	1	2	1	1	1	1	1	1	1	1	1	1	1	1	1	1	1	1	1	1	1	1	1	1
mc2	.	.	.	.	.	.	2	2	2	2	2	1	2	2	2	2	2	2	2	2	.	2	1	2	1	2	2	2	2	2	2	2	2	2	1	2	2	1	1	1	1	2	2	2	1	2	1	2	2
mc3	.	.	.	.	.	.	2	2	1	2	1	1	1	2	1	2	2	2	2	1	.	1	1	2	2	2	2	1	1	2	1	1	1	2	1	2	1	2	2	2	1	2	2	2	1	1	1	1	2
mc4	.	.	.	.	.	.	2	2	2	2	2	2	2	2	2	2	2	2	2	2	.	2	2	2	2	2	2	2	2	2	2	2	2	2	2	2	2	1	2	2	2	2	2	2	2	2	2	2	2
mc5	.	.	.	.	.	.	2	2	2	2	2	1	2	2	2	2	2	2	2	2	.	2	1	2	2	1	2	2	2	2	2	2	2	1	2	2	2	2	2	2	2	2	2	2	2	2	2	2	2
mc6	.	.	.	.	.	.	1	1	1	1	1	1	1	2	1	2	1	1	2	1	.	1	1	1	1	1	2	1	1	2	1	1	1	1	1	1	1	1	1	1	1	1	1	2	1	1	1	1	1
mc7	.	.	.	.	.	.	2	2	2	2	2	1	2	2	2	2	2	2	2	2	.	2	1	2	2	2	2	2	2	2	2	2	2	1	2	2	2	2	2	1	2	2	2	2	2	2	2	2	2
mc8	.	.	.	.	.	.	2	2	2	2	2	1	2	2	2	2	2	2	2	2	.	2	2	2	2	2	2	2	2	2	2	2	2	2	2	2	2	2	2	2	2	2	2	2	2	2	2	2	2
mc9	.	.	.	.	.	.	1	1	1	1	1	1	1	2	1	2	1	1	2	1	.	1	1	1	1	1	2	1	1	1	1	1	1	2	1	1	1	1	1	1	1	1	1	1	1	1	1	1	1
mc10	.	.	.	.	.	.	2	2	1	.	2	1	1	2	2	2	1	2	2	2	.	1	1	2	1	1	2	1	2	2	1	1	2	2	1	1	2	1	1	1	1	1	1	2	1	1	1	1	2
mc11	.	.	.	.	.	.	2	2	2	2	2	2	2	2	2	2	2	2	2	2	.	2	2	2	2	2	.	2	2	2	2	2	2	2	2	2	2	2	2	2	2	2	2	2	2	2	2	2	2
mc12	.	.	.	.	.	.	2	1	1	1	1	1	1	2	1	2	1	1	2	1	.	1	1	2	1	1	2	1	1	2	1	1	1	2	1	1	1	1	1	1	1	1	1	2	1	1	1	2	1
mc13	.	.	.	.	.	.	1	1	1	1	1	1	1	2	1	1	1	1	2	1	.	1	1	1	1	1	2	1	1	1	1	1	1	1	1	1	1	1	1	1	1	1	1	1	1	1	1	1	1
mc14	.	.	.	.	.	.	2	2	2	2	2	1	2	2	2	2	2	2	2	2	.	2	1	2	2	2	2	2	2	2	2	2	2	2	1	1	2	2	2	1	2	2	2	2	2	2	2	2	2
mc15	.	.	.	.	.	.	2	2	2	2	1	1	2	2	1	2	2	2	2	2	.	1	1	2	1	1	2	1	2	2	2	1	2	1	1	1	2	1	1	1	1	2	2	2	1	1	1	1	1
mc16	.	.	.	.	.	.	2	2	1	2	1	1	2	2	1	2	2	2	2	1	.	1	1	2	1	1	2	1	1	2	1	1	2	2	1	2	1	1	1	1	1	1	2	2	1	1	1	1	1
mc17	.	.	.	.	.	.	2	1	1	1	1	1	1	2	2	2	1	1	2	1	.	1	1	1	1	1	2	1	1	1	1	1	1	1	1	1	1	1	1	1	1	1	1	1	1	1	1	1	1
mc18	.	.	.	.	.	.	2	2	1	2	2	1	1	2	1	2	2	2	2	2	.	1	1	2	2	1	2	1	2	2	1	1	2	2	1	1	1	2	1	1	2	1	2	2	2	1	1	1	2
mc19	.	.	.	.	.	.	2	2	2	2	2	1	2	2	2	2	2	2	2	2	.	2	2	2	2	2	2	2	2	2	2	2	2	2	2	2	2	2	2	2	2	2	2	2	2	2	2	2	2
mc20	.	.	.	.	.	.	1	1	1	1	1	1	1	2	1	2	1	1	2	1	.	1	1	1	1	1	2	1	1	1	1	1	1	1	1	1	1	1	1	1	1	1	1	1	1	1	1	1	1
mc21	.	.	.	.	.	.	2	2	2	2	2	1	2	2	2	2	2	2	2	2	.	2	1	2	1	2	2	2	2	2	1	2	2	2	1	1	2	2	1	1	2	1	2	2	2	2	1	2	2
mc22	.	.	.	.	.	.	2	1	1	2	1	1	1	2	2	2	1	1	2	1	.	1	1	1	1	1	2	1	1	2	1	1	1	1	1	1	1	1	1	1	1	1	1	2	1	1	1	1	1
mc23	.	.	.	.	.	.	2	2	2	2	2	1	2	2	2	2	2	2	2	2	.	2	2	2	2	2	2	2	2	2	2	2	2	2	1	2	2	2	1	2	2	2	2	2	2	2	2	2	2
mc24	.	.	.	.	.	.	2	1	1	1	1	1	1	2	1	2	1	1	2	1	.	1	1	1	1	1	2	1	1	1	1	1	1	1	1	1	1	1	1	1	1	1	1	1	1	1	1	1	1
mc25	.	.	.	.	.	.	2	2	2	2	1	1	2	2	2	2	2	2	2	2	.	1	1	2	2	2	2	2	2	2	2	1	2	2	1	1	2	2	1	1	2	2	2	2	2	2	2	2	2
mc26	.	.	.	.	.	.	1	1	1	1	1	1	1	2	1	2	1	1	2	1	.	1	1	1	1	1	2	1	1	1	1	1	1	1	1	1	1	1	1	1	1	1	1	1	1	1	1	1	1
mc27	.	.	.	.	.	.	2	2	2	2	2	2	2	2	2	2	2	2	2	2	.	2	2	2	2	2	2	2	2	2	2	2	2	2	2	2	2	2	1	1	2	2	2	2	2	2	2	2	2
count	.	.	.	.	.	.	27	27	27	26	27	27	27	27	27	27	27	27	27	27	.	27	27	27	27	27	26	27	27	27	27	27	27	27	27	27	27	27	27	27	27	27	27	27	27	27	27	27	27
mc1_for_xlsx	.	.	.	.	.	.	0	0	0	0	0	0	0	1	0	1	0	0	1	0	.	0	0	0	0	0	1	0	0	0	0	0	0	0	0	0	0	0	0	0	0	0	0	0	0	0	0	0	0
mc2_for_xlsx	.	.	.	.	.	.	1	1	1	1	1	0	1	1	1	1	1	1	1	1	.	1	0	1	0	1	1	1	1	1	1	1	1	1	0	1	1	0	0	0	0	1	1	1	0	1	0	1	1
mc3_for_xlsx	.	.	.	.	.	.	1	1	0	1	0	0	0	1	0	1	1	1	1	0	.	0	0	1	1	1	1	0	0	1	0	0	0	1	0	1	0	1	1	1	0	1	1	1	0	0	0	0	1
mc4_for_xlsx	.	.	.	.	.	.	1	1	1	1	1	1	1	1	1	1	1	1	1	1	.	1	1	1	1	1	1	1	1	1	1	1	1	1	1	1	1	0	1	1	1	1	1	1	1	1	1	1	1
mc5_for_xlsx	.	.	.	.	.	.	1	1	1	1	1	0	1	1	1	1	1	1	1	1	.	1	0	1	1	0	1	1	1	1	1	1	1	0	1	1	1	1	1	1	1	1	1	1	1	1	1	1	1
mc6_for_xlsx	.	.	.	.	.	.	0	0	0	0	0	0	0	1	0	1	0	0	1	0	.	0	0	0	0	0	1	0	0	1	0	0	0	0	0	0	0	0	0	0	0	0	0	1	0	0	0	0	0
mc7_for_xlsx	.	.	.	.	.	.	1	1	1	1	1	0	1	1	1	1	1	1	1	1	.	1	0	1	1	1	1	1	1	1	1	1	1	0	1	1	1	1	1	0	1	1	1	1	1	1	1	1	1
mc8_for_xlsx	.	.	.	.	.	.	1	1	1	1	1	0	1	1	1	1	1	1	1	1	.	1	1	1	1	1	1	1	1	1	1	1	1	1	1	1	1	1	1	1	1	1	1	1	1	1	1	1	1
mc9_for_xlsx	.	.	.	.	.	.	0	0	0	0	0	0	0	1	0	1	0	0	1	0	.	0	0	0	0	0	1	0	0	0	0	0	0	1	0	0	0	0	0	0	0	0	0	0	0	0	0	0	0
mc10_for_xlsx	.	.	.	.	.	.	1	1	0	.	1	0	0	1	1	1	0	1	1	1	.	0	0	1	0	0	1	0	1	1	0	0	1	1	0	0	1	0	0	0	0	0	0	1	0	0	0	0	1
mc11_for_xlsx	.	.	.	.	.	.	1	1	1	1	1	1	1	1	1	1	1	1	1	1	.	1	1	1	1	1	.	1	1	1	1	1	1	1	1	1	1	1	1	1	1	1	1	1	1	1	1	1	1
mc12_for_xlsx	.	.	.	.	.	.	1	0	0	0	0	0	0	1	0	1	0	0	1	0	.	0	0	1	0	0	1	0	0	1	0	0	0	1	0	0	0	0	0	0	0	0	0	1	0	0	0	1	0
mc13_for_xlsx	.	.	.	.	.	.	0	0	0	0	0	0	0	1	0	0	0	0	1	0	.	0	0	0	0	0	1	0	0	0	0	0	0	0	0	0	0	0	0	0	0	0	0	0	0	0	0	0	0
mc14_for_xlsx	.	.	.	.	.	.	1	1	1	1	1	0	1	1	1	1	1	1	1	1	.	1	0	1	1	1	1	1	1	1	1	1	1	1	0	0	1	1	1	0	1	1	1	1	1	1	1	1	1
mc15_for_xlsx	.	.	.	.	.	.	1	1	1	1	0	0	1	1	0	1	1	1	1	1	.	0	0	1	0	0	1	0	1	1	1	0	1	0	0	0	1	0	0	0	0	1	1	1	0	0	0	0	0
mc16_for_xlsx	.	.	.	.	.	.	1	1	0	1	0	0	1	1	0	1	1	1	1	0	.	0	0	1	0	0	1	0	0	1	0	0	1	1	0	1	0	0	0	0	0	0	1	1	0	0	0	0	0
mc17_for_xlsx	.	.	.	.	.	.	1	0	0	0	0	0	0	1	1	1	0	0	1	0	.	0	0	0	0	0	1	0	0	0	0	0	0	0	0	0	0	0	0	0	0	0	0	0	0	0	0	0	0
mc18_for_xlsx	.	.	.	.	.	.	1	1	0	1	1	0	0	1	0	1	1	1	1	1	.	0	0	1	1	0	1	0	1	1	0	0	1	1	0	0	0	1	0	0	1	0	1	1	1	0	0	0	1
mc19_for_xlsx	.	.	.	.	.	.	1	1	1	1	1	0	1	1	1	1	1	1	1	1	.	1	1	1	1	1	1	1	1	1	1	1	1	1	1	1	1	1	1	1	1	1	1	1	1	1	1	1	1
mc20_for_xlsx	.	.	.	.	.	.	0	0	0	0	0	0	0	1	0	1	0	0	1	0	.	0	0	0	0	0	1	0	0	0	0	0	0	0	0	0	0	0	0	0	0	0	0	0	0	0	0	0	0
mc21_for_xlsx	.	.	.	.	.	.	1	1	1	1	1	0	1	1	1	1	1	1	1	1	.	1	0	1	0	1	1	1	1	1	0	1	1	1	0	0	1	1	0	0	1	0	1	1	1	1	0	1	1
mc22_for_xlsx	.	.	.	.	.	.	1	0	0	1	0	0	0	1	1	1	0	0	1	0	.	0	0	0	0	0	1	0	0	1	0	0	0	0	0	0	0	0	0	0	0	0	0	1	0	0	0	0	0
mc23_for_xlsx	.	.	.	.	.	.	1	1	1	1	1	0	1	1	1	1	1	1	1	1	.	1	1	1	1	1	1	1	1	1	1	1	1	1	0	1	1	1	0	1	1	1	1	1	1	1	1	1	1
mc24_for_xlsx	.	.	.	.	.	.	1	0	0	0	0	0	0	1	0	1	0	0	1	0	.	0	0	0	0	0	1	0	0	0	0	0	0	0	0	0	0	0	0	0	0	0	0	0	0	0	0	0	0
mc25_for_xlsx	.	.	.	.	.	.	1	1	1	1	0	0	1	1	1	1	1	1	1	1	.	0	0	1	1	1	1	1	1	1	1	0	1	1	0	0	1	1	0	0	1	1	1	1	1	1	1	1	1
mc26_for_xlsx	.	.	.	.	.	.	0	0	0	0	0	0	0	1	0	1	0	0	1	0	.	0	0	0	0	0	1	0	0	0	0	0	0	0	0	0	0	0	0	0	0	0	0	0	0	0	0	0	0
mc27_for_xlsx	.	.	.	.	.	.	1	1	1	1	1	1	1	1	1	1	1	1	1	1	.	1	1	1	1	1	1	1	1	1	1	1	1	1	1	1	1	1	0	0	1	1	1	1	1	1	1	1	1
geomean_k	.	.	.	.	.	.	0.000630918	0.00214043	0.00735685	0.00159111	0.00724352	0.158769	0.00543812	0.000158228	0.00730104	0.000184623	0.00289563	0.00214043	0.000158228	0.00392803	.	0.0135665	0.0639373	0.00157082	0.00983831	0.0135219	0.000158278	0.0099008	0.00392803	0.000858299	0.0101028	0.0135665	0.00291054	0.00306395	0.047289	0.0185116	0.00542508	0.00716423	0.0253412	0.0433568	0.00974189	0.00737208	0.00289563	0.000858299	0.00974189	0.0099008	0.0184768	0.00731128	0.00388758
negLog_geomean_k	.	.	.	.	.	.	7.36833	6.14675	4.91212	6.44333	4.92765	1.84031	5.21432	8.75147	4.91974	8.5972	5.84455	6.14675	8.75147	5.53962	.	4.30015	2.74985	6.45616	4.62147	4.30344	8.75116	4.61514	5.53962	7.06056	4.59494	4.30015	5.83942	5.78805	3.05148	3.98936	5.21672	4.93865	3.67532	3.13829	4.63132	4.91006	5.84455	7.06056	4.63132	4.61514	3.99124	4.91834	5.54997
Overall Consistency	.	.	.	.	.	.	0.962963	1	0.925926	0.962963	0.962963	1	0.888889	1	0.888889	1	0.962963	1	1	0.962963	.	0.925926	0.962963	0.962963	0.925926	0.888889	0.962963	0.962963	0.962963	0.962963	0.925926	0.925926	0.962963	0.814815	0.962963	0.851852	0.925926	0.925926	0.888889	0.851852	1	0.888889	0.962963	0.962963	1	0.962963	1	0.925926	1
Overall_proportion_LDR	.	.	.	.	.	.	0.888889	0.666667	0.666667	0.666667	0.444444	0.111111	0.666667	1	0.666667	1	0.666667	0.666667	1	0.666667	.	0.444444	0.333333	0.777778	0.444444	0.555556	1	0.555556	0.666667	0.777778	0.666667	0.444444	0.666667	0.777778	0.222222	0.444444	0.666667	0.333333	0.222222	0.333333	0.444444	0.666667	0.666667	0.777778	0.444444	0.555556	0.444444	0.666667	0.555556
[truncated: 107 more columns]
